# Supplementary material for: Photocatalytic oxidation of lignin model compounds to benzaldehyde and phenol: a preliminary study on extracted lignin
Source: Royal Society of Chemistry journal article supplement (doi:10.1039/d5nj03780h), 2025-12-17
Supplement: d5nj03780h1.pdf [file d5nj03780h1.pdf]

## Supporting Information

### Photocatalytic Oxidation of Lignin Model Compounds to Benzaldehyde and Phenol: A Preliminary Study on Extracted Lignin

Xinwei Liu<sup>\*a</sup>, Ruimeng You<sup>a</sup>, Ziqi feng<sup>a</sup>, Jianyu Huo<sup>a</sup>, Fengxia Sun<sup>\*a</sup>

a. College of Chemical and Pharmaceutical Engineering, Hebei University of Science and Technology

Shijiazhuang 050018 (China)

E-mail: [liuxinwei@hebust.edu.cn](mailto:liuxinwei@hebust.edu.cn)

### Contents

|                                                                                     |    |
|-------------------------------------------------------------------------------------|----|
| 1. General.....                                                                     | 3  |
| 1.1 Materials .....                                                                 | 3  |
| 1.2 Instrumentation .....                                                           | 3  |
| 2. Synthesis of lignin models .....                                                 | 5  |
| 3. Reaction equipment and experiment.....                                           | 7  |
| 3.1 Experimental installation .....                                                 | 7  |
| 3.2 Photocatalytic cleavage of lignin model compounds.....                          | 7  |
| 3.3 Screening of parameters for oxidative cleavage of lignin model compound.....    | 8  |
| 3.4 Spectroscopic Data.....                                                         | 9  |
| 4. Mechanistic Experiments.....                                                     | 14 |
| 4.1 Control experiments.....                                                        | 14 |
| 4.2 Electron paramagnetic resonance (EPR) spectroscopy experiments .....            | 15 |
| 4.3 Detection of CO <sub>2</sub> .....                                              | 15 |
| 4.4 Carbon mass balance.....                                                        | 16 |
| 5. Degradation of natural lignin .....                                              | 17 |
| 5.1 Extraction of lignin .....                                                      | 17 |
| 5.2 Gel Permeation Chromatography (GPC) test results of poplar lignin samples ..... | 17 |
| 5.3 Depolymerization of lignin .....                                                | 18 |
| 5.4 GC-MS analysis of real lignin depolymerization products.....                    | 19 |
| 6. <sup>1</sup> H NMR and <sup>13</sup> C NMR spectra of compounds .....            | 21 |
| 7. References.....                                                                  | 37 |

## 1. General

### 1.1 Materials

All reagents and solvents were purchased from Accela, Adamas, Innochem, Psaitong and Aladdin. Unless otherwise noted, materials obtained from commercial suppliers were used without further purification.

### 1.2 Instrumentation

Blue LED lamps, radiators, fan, regulated DC power supplies and quartz reaction tubes used in the photocatalytic reaction were purchased from Shenzhen Xindaxin Photoelectric Technology Co., Ltd.

Products were purified by flash chromatography on silica gel. Analysis of crude reaction mixture was performed on an Agilent 7820A GC System with a HP-INNOWAX capillary column (30 m×0.25 mm×0.32 μm) and an FID detector. The following GC temperature program was used: 60 °C is maintained for 2 minutes, rises to 150 °C at 10 °C/min, and finally rises to 300 °C at a rate of 20 °C/min, and hold for 4 minutes. Nitrogen was used as a carrier gas. The injector temperature was held at 250 °C.

GC-MS analysis was carried out on a SHIMADZU GC-MSQP 2010 with a DB-5 capillary column (30 m×0.25 mm×0.32 μm).

<sup>1</sup>H NMR spectra were recorded in CDCl<sub>3</sub> or DMSO using internal reference (the residue proton peaks of CDCl<sub>3</sub> at 7.26 ppm and DMSO at 2.5 ppm) on Bruker 400 spectrometer. Liquid <sup>13</sup>C NMR was recorded at 100.6 MHz in CDCl<sub>3</sub> using residual CDCl<sub>3</sub> as internal reference (the residue proton peaks of CDCl<sub>3</sub> at 77.02 ppm and DMSO at 40.03 ppm).

Powder X-ray diffraction (PXRD) analysis was performed using a D / MAX-2500 diffractometer (Rigaku, Japan) with Cu Kα radiation (λ = 1.5405 Å). The working voltage of the instrument is 40 kV, the voltage is 150 mA, the scanning rate is 10°/min, the step size is 0.02°, and the data in the range of 0-50° are collected.

Fourier Transform Infrared Spectroscopy (FT-IR) spectra were collected on PerkinElmer Spectrum 100 spectrometer.

Scanning electron microscopy (SEM) were conducted on a Hitachi JSM-7610F field emission scanning electron microscope.

## SUPPORTING INFORMATION

---

The pore structure of the sample was characterized using a Quantachrome Nova Station A gas adsorption analyzer (Quantachrome Instruments, USA) with Quantachrome ASiQwin v3.01 for data acquisition and processing. Prior to testing, 0.1197 g of the sample was placed in a 1 cc cell without outgassing. Nitrogen adsorption-desorption isotherms were measured at 77.3 K (liquid nitrogen bath), with adsorption/desorption pressure tolerance of 0.100/0.100, equilibrium time of 60/60 sec, equilibrium timeout of 240/240 sec, relative pressure ( $P/P_0$ ) range of 0.026–1.09, and total test duration of 294.2 min. The specific surface area was calculated via the multi-point BET method ( $r=0.999882$ ), while the BJH method was used to analyze adsorption/desorption branch data, yielding pore volume, pore diameter, and specific surface area.

The sample NH<sub>3</sub>-TPD test was performed using an AutoChem II 2920 chemisorption instrument (Micromeritics, USA, with AutoChem v4.0 software) ; the 0.100 g (40-60 mesh) sample was weighed in a U-shaped quartz tube, desorbed at 300 °C for 120 min in He gas ( 50 mL/min ) and cooled to 50 °C, and then adsorbed by 10 % NH<sub>3</sub>-He mixed gas ( 30 mL/min ) for 60 min, purged by He gas for 90 min, and then heated from 50 °C to 800 °C at a rate of 10 °C/min. The NH<sub>3</sub> desorption signal was detected by TCD, and the intensity of acidic sites was determined by software baseline correction and peak area integration.

## 2. Synthesis of lignin models

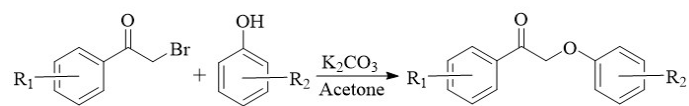

Scheme S1 synthetic ketone lignin model.

The synthesis reaction was carried out in a 150 mL round glass flask containing a condenser. 2-phenoxyacetophenone were synthesized by the reaction of the corresponding phenol with 2-bromoacetophenone according to the reported procedure<sup>1</sup>. Typically, 2-bromoacetophenone (5 mmol) is dissolved in a solution of  $K_2CO_3$  (7.5 mmol, 1.036 g) and phenol (5 mmol) in acetone (50 mL) and loaded in a reactor. The reaction mixture is then stirred at reflux temperature for 5 hours, filtered and vacuumized. The residue was purified by column chromatography with petroleum ether: ethyl acetate (v:v=4:1) a stirring. For the other methoxy substituted 2-phenoxy-1-phenylethanone, the preparation procedure is the same as described above, except of using different starting materials.

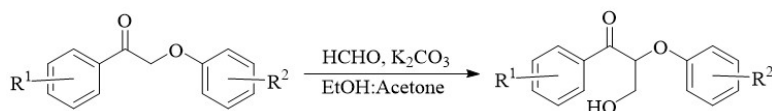

Scheme S2 synthetic 3-hydroxy-2-phenoxy-1-phenylpropan-1-one.

According to the reaction process of the previous step in **Scheme S1**, to a stirring suspension of  $K_2CO_3$  (0.6 g, 4.3 mmol) in ethanol:acetone (v:v=1:1, total 20 mL) and 2-phenoxyacetophenones (0.78 g, 4 mmol) at rt, a water solution of formaldehyde (36.5~38wt%, 0.6 mL, 7.3 mmol) was added. After 4 h, the reaction mixture was filtered to remove  $K_2CO_3$  and concentrated in vacuo to get a solid product. The crude product was purified with petroleum ether: ethyl acetate (v:v=3:1) to obtain the required 2-phenoxyacetophenone, on silica gel to obtain 3-hydroxy-1,2-diphenylpropan-1-one in 90% yield.

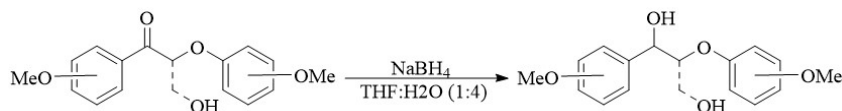

Scheme S3 synthetic lignin model compounds.

The resulting compound (3.5 mmol, 0.847 g) from the previous step was dissolved in the mixture of THF:H<sub>2</sub>O (v:v=5:1, total 25 mL), and sodium borohydride (7 mmol, 0.26 g) was added portionwise to maintain a gentle evolution of gas. Then, the mixture was stirred for 6 h at room temperature. The reaction mixture was quenched

## SUPPORTING INFORMATION

---

with saturated aqueous  $\text{NH}_4\text{Cl}$  (50 mL) and diluted with 30 mL water. The aqueous portion was extracted with ethyl acetate (3×30mL). The organic parts were combined, dried over  $\text{MgSO}_4$ , filtered and concentrated under vacuum. The residue was purified by column chromatography with hexane:ethyl acetate (v:v=2:1).

## 3. Reaction equipment and experiment

### 3.1 Experimental installation

The degradation experiments were carried out in a photochemical reactor with two 20W blue LEDs from Shenzhen Chundaxin Optoelectronics, with a spectral distribution of 400 nm-410 nm, and borosilicate glass tubes were used without filters. The distance between the reaction tube and the LED is 30mm

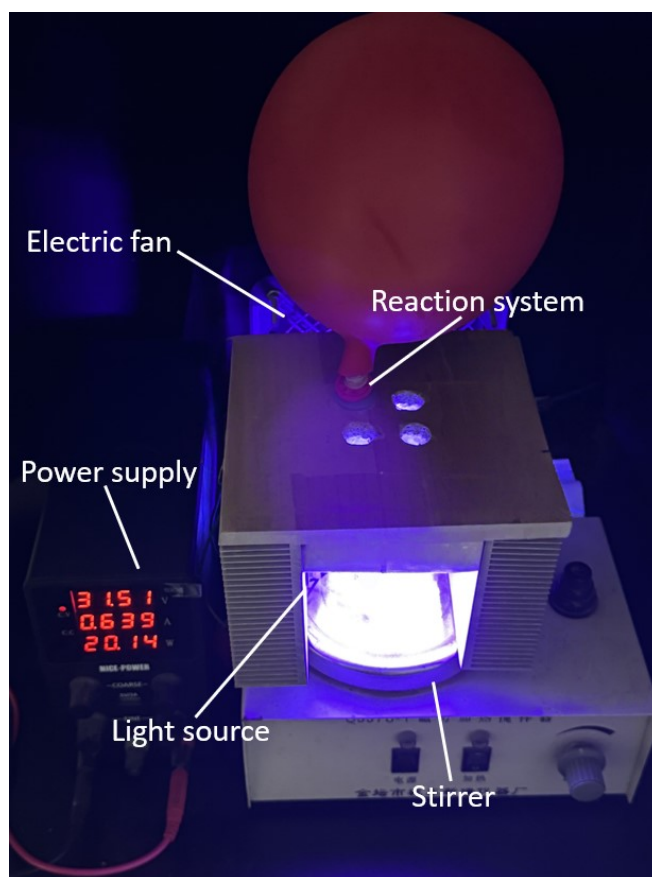

**Figure S1** The experimental instruments of the light-promoted reactions.

### 3.2 Photocatalytic cleavage of lignin model compounds

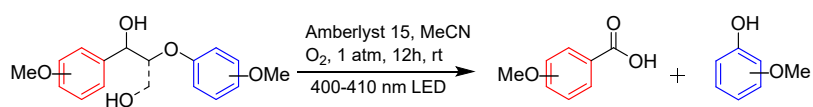

**Scheme S4.** Cleavage of lignin model compound.

## SUPPORTING INFORMATION

The general procedure of the reaction: the photocatalytic equipment is composed of two 400-410 nm LED series. The constant voltage steady current power supply voltage is 32 V, the electric current is 1.25 A, and the power is 40 W. Feed was added to a 10mL quartz reaction tube and an oxygen balloon was mounted and stirred on a photocatalytic device while the device was cooled by a fan. After 12 hours, the reaction solution was diluted and extracted with dichloromethane. The yield of the obtained product was determined by GC with dodecane as internal standard. The conversion and yield were calculated according to the formula (1)-(2). The main products of the reaction were purified by silica gel column chromatography, and  $\text{CDCl}_3$  was used as solvent for NMR detection.

$$\text{Conversion}(\%) = \frac{C_0}{C_R} \times 100\% \quad (1)$$

$$\text{Yield}(\%) = \frac{C_E}{C_0} \times 100\% \quad (2)$$

In the equation,  $C_0$  and  $C_R$  are the molar number of lignin model compounds at the initial time and R time, respectively, and  $C_E$  is the molar number of the generated product.

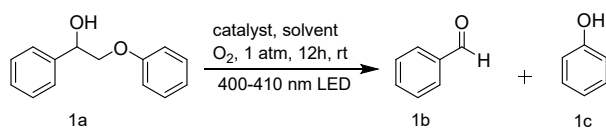

**Scheme S5.** Specific examples of photocatalytic lignin model compounds

Substrate 1a (214 mg, 1 mmol, 1.0 equiv) in 2 mL of MeCN was added with Amberlyst 15 (27.8 mg, 0.2 mmol, 0.2 equiv). Then solution system stirred at room temperature in a glass test tube under oxygen balloon (1 bar) and irradiated with blue LED (400-410 nm, 40W). The reaction was completed at 12 hours through TLC monitoring. The mixture was extracted with  $\text{CH}_2\text{Cl}_2$  (25 mL $\times$ 3). The organic parts were combined, dried over  $\text{MgSO}_4$ , filtered and concentrated under vacuum. The resulting residue was purified by flash chromatography over silica gel (PE/EA = 3:1) to give 1b (97.5 mg, 92% isolated yield) and 1c (83.7 mg, 89% isolated yield).

### 3.3 Screening of parameters for oxidative cleavage of lignin model compound

**Table S1.** Screening of parameters for oxidative cleavage of lignin model compound

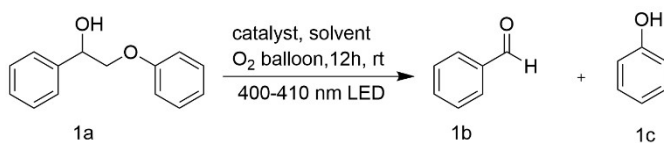



## SUPPORTING INFORMATION

| Entry           | Catalyst                              | Solvent          | Yield<br>1b (%) | Yield<br>1c (%) | Conv.<br>(%) |
|-----------------|---------------------------------------|------------------|-----------------|-----------------|--------------|
| 1               | Amberlyst 15                          | MeCN             | 92              | 89              | 95           |
| 2               | Amberlyst 16                          | MeCN             | 76              | 80              | 81           |
| 3               | Amberlyst 35                          | MeCN             | 43              | 38              | 49           |
| 4               | Amberlyst 36                          | MeCN             | 46              | 35              | 50           |
| 5               | HCl (6 M)                             | MeCN             | 24              | 18              | 33           |
| 6               | H <sub>2</sub> SO <sub>4</sub> (40%w) | MeCN             | 37              | 21              | 42           |
| 7               | HBF <sub>4</sub> (70%w)               | MeCN             | 30              | 21              | 35           |
| 8               | Amberlyst 15                          | acetone          | 48              | 42              | 53           |
| 9               | Amberlyst 15                          | MeOH             | 69              | 48              | 74           |
| 10              | Amberlyst 15                          | H <sub>2</sub> O | 0               | 0               | 0            |
| 11 <sup>a</sup> | Amberlyst 15                          | MeCN             | 51              | 42              | 55           |
| 12 <sup>b</sup> | Amberlyst 15                          | MeCN             | 32              | 26              | 36           |
| 13 <sup>c</sup> | Amberlyst 15                          | MeCN             | 0               | 0               | 0            |

Reaction conditions: substrate 1a (0.1 mmol), catalyst (0.2 eq), solvent (2 mL), O<sub>2</sub> (1 atm), room temperature for 12 h and irradiated with blue LED (400-410 nm, 20 W). a)blue LED (365 nm, 20 W), b)Ar instead of O<sub>2</sub>, c)Ar instead of O<sub>2</sub>, Yield of products isolated via column chromatography.

### 3.4 Spectroscopic Data

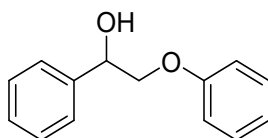

2-Phenoxy-1-phenyl-ethanol (**1a**)

Data for 1a: <sup>1</sup>H NMR (400 MHz, Chloroform-d) δ 7.39 (d, J = 6.9 Hz, 2H), 7.36 – 7.16 (m, 5H), 6.95 – 6.86 (m, 1H), 6.85 (dd, J = 7.7, 1.5 Hz, 2H), 5.05 (dt, J = 9.0, 2.7 Hz, 1H), 4.04 (dd, J = 9.6, 3.2 Hz, 1H), 3.94 (t, J = 9.2 Hz, 1H), 2.72 (d, J = 2.4 Hz, 1H); <sup>13</sup>C NMR (101 MHz, Chloroform-d) δ 158.43, 139.70, 129.56, 128.57, 128.18, 126.29, 121.34, 114.70, 73.35, 72.61, 1.01.

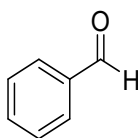

Benzaldehyde (**1b**)

## SUPPORTING INFORMATION

Data for **1b**:  $^1\text{H}$  NMR (400 MHz,  $\text{CDCl}_3$ )  $\delta$  10.02 (s, 1H), 7.91 – 7.84 (m, 2H), 7.64 – 7.58 (m, 1H), 7.56 – 7.50 (m, 2H).  $^{13}\text{C}$  NMR (101 MHz,  $\text{CDCl}_3$ )  $\delta$  192.53, 171.59, 136.41, 134.52, 133.72, 130.20, 129.78, 129.44, 129.03, 128.50, 77.43, 77.11, 76.79.

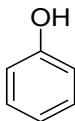

Phenol (**1c**)

Data for **1c**:  $^1\text{H}$  NMR (500 MHz, Chloroform- $d$ )  $\delta$  7.33 – 7.26 (m, 2H), 7.02 – 6.95 (m, 1H), 6.92 – 6.85 (m, 2H), 5.03 (s, 1H);  $^{13}\text{C}$  NMR (126 MHz, Chloroform- $d$ )  $\delta$  155.46, 129.75, 120.90, 115.37.

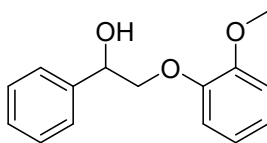

2-(2-methoxyphenoxy)-1-phenylethan-1-ol (**2**)

Data for **2**:  $^1\text{H}$  NMR (500 MHz, Chloroform- $d$ )  $\delta$  7.48 (d,  $J$  = 7.4 Hz, 2H), 7.38 (dt,  $J$  = 30.3, 7.2 Hz, 3H), 7.04 (ddd,  $J$  = 8.0, 7.1, 1.8 Hz, 1H), 6.98 (td,  $J$  = 8.3, 1.7 Hz, 2H), 6.96 – 6.90 (m, 1H), 5.15 (dt,  $J$  = 9.8, 2.4 Hz, 1H), 4.23 (dd,  $J$  = 10.1, 2.9 Hz, 1H), 4.02 (t,  $J$  = 9.8 Hz, 1H), 3.93 (s, 3H), 3.49 (d,  $J$  = 2.1 Hz, 1H);  $^{13}\text{C}$  NMR (126 MHz,  $\text{CDCl}_3$ )  $\delta$  150.24, 139.52, 128.54, 128.07, 126.33, 122.67, 121.15, 116.19, 112.07, 77.31, 77.06, 76.80, 76.45, 72.38, 55.91, 0.04.

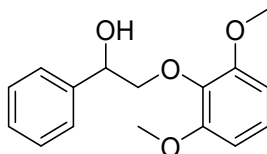

2-(4-chlorophenoxy)-1-phenylethan-1-ol (**3**)

Data for **3**:  $^1\text{H}$  NMR (500 MHz, Chloroform- $d$ )  $\delta$  7.46 – 7.40 (m, 2H), 7.40 – 7.34 (m, 2H), 7.31 (s, 5H), 7.08 (t,  $J$  = 8.4 Hz, 1H), 6.65 (d,  $J$  = 8.4 Hz, 2H), 5.00 (d,  $J$  = 9.8 Hz, 1H), 4.56 (d,  $J$  = 1.6 Hz, 1H), 4.45 (dd,  $J$  = 11.0, 2.7 Hz, 1H), 3.92 (s, 6H), 3.76 (dd,  $J$  = 11.0, 10.0 Hz, 1H);  $^{13}\text{C}$  NMR (126 MHz,  $\text{CDCl}_3$ )  $\delta$  153.30, 128.36, 127.73, 126.35, 124.13, 105.20, 80.09, 77.31, 77.05, 76.80, 72.47, 56.14.

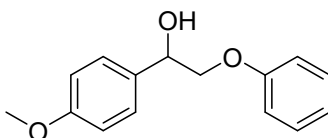

1-(4-methoxyphenyl)-2-phenoxyethan-1-ol (**4**)

Data for **4**:  $^1\text{H}$  NMR (600 MHz, Chloroform- $d$ )  $\delta$  7.38 (d,  $J$  = 8.7 Hz, 2H), 7.29 (dd,  $J$  = 8.7, 7.2 Hz, 2H), 7.00

## SUPPORTING INFORMATION

– 6.95 (m, 1H), 6.94 – 6.91 (m, 4H), 5.08 (d,  $J = 7.8$  Hz, 1H), 4.08 (dd,  $J = 9.6, 3.2$  Hz, 1H), 4.00 (t,  $J = 9.2$  Hz, 1H), 3.82 (s, 3H), 2.73 (d,  $J = 2.3$  Hz, 1H).  $^{13}\text{C}$  NMR (151 MHz, Chloroform- $d$ )  $\delta$  159.70, 158.55, 131.91, 129.70, 127.71, 121.42, 114.79, 114.14, 73.43, 72.35, 55.47.

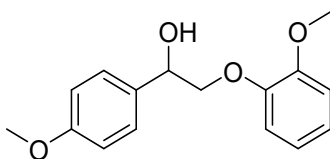

2-(2-methoxyphenoxy)-1-(4-methoxyphenyl) ethan-1-ol (**5**)

Data for **5**:  $^1\text{H}$  NMR (500 MHz, Chloroform- $d$ )  $\delta$  7.39 – 6.82 (m, 9H), 5.06 (d,  $J = 8.4$  Hz, 1H), 4.15 (d,  $J = 12.7$  Hz, 1H), 3.96 (t,  $J = 9.8$  Hz, 1H), 3.85 (d,  $J = 39.8$  Hz, 6H), 3.44 (s, 1H);  $^{13}\text{C}$  NMR (126 MHz,  $\text{CDCl}_3$ )  $\delta$  159.47, 150.23, 148.05, 131.66, 127.60, 122.59, 121.12, 116.11, 113.96, 112.05, 77.32, 77.06, 76.81, 76.38, 71.98, 55.90, 55.35, 29.77, 0.04.

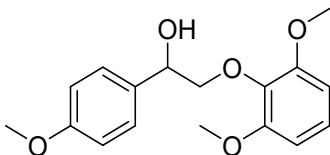

2-(2,6-dimethoxyphenoxy)-1-(4-methoxyphenyl) ethan-1-ol (**6**)

Data for **6**:  $^1\text{H}$  NMR (500 MHz, Chloroform- $d$ )  $\delta$  7.31 (d,  $J = 8.8$  Hz, 3H), 7.04 (t,  $J = 8.4$  Hz, 1H), 6.87 (d,  $J = 8.7$  Hz, 2H), 6.61 (d,  $J = 8.4$  Hz, 2H), 4.91 (d,  $J = 12.0$  Hz, 1H), 4.48 (s, 1H), 4.37 (dd,  $J = 11.0, 2.7$  Hz, 1H), 3.90 – 3.63 (m, 9H), 1.57 (s, 2H).  $^{13}\text{C}$  NMR (126 MHz,  $\text{CDCl}_3$ )  $\delta$  159.23, 153.30, 136.82, 131.59, 127.60, 124.09, 113.80, 105.18, 80.08, 77.32, 77.06, 76.81, 72.04, 56.13, 55.31, 0.04.

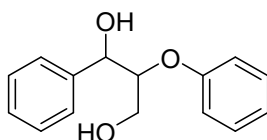

2-phenoxy-1-phenylpropane-1,3-diol (**7**)

Data for **7**:  $^1\text{H}$  NMR (500 MHz, Chloroform- $d$ )  $\delta$  7.48 – 7.24 (m, 7H), 7.04 – 6.89 (m, 3H), 5.09 (ddd,  $J = 34.9, 6.0, 3.3$  Hz, 1H), 4.44 (dt,  $J = 6.6, 4.2$  Hz, 1H), 4.00 – 3.77 (m, 1H), 3.59 (ddd,  $J = 11.8, 7.2, 4.0$  Hz, 1H), 2.81 (dd,  $J = 13.2, 3.4$  Hz, 1H), 1.81 (dd,  $J = 7.3, 5.4$  Hz, 1H).  $^{13}\text{C}$  NMR (126 MHz, Chloroform- $d$ )  $\delta$  157.99, 157.48, 140.13, 139.56, 129.68, 129.60, 128.55, 128.48, 128.27, 127.93, 127.39, 126.87, 126.15, 122.00, 121.88, 116.55, 116.48, 83.05, 81.83, 73.92, 61.17, 61.04.

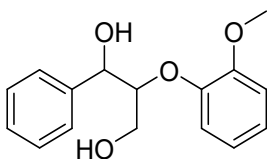

2-(2-methoxyphenoxy)-1-phenylpropane-1,3-diol (**8**)

Data for **8**:  $^1\text{H}$  NMR (500 MHz, Chloroform- $d$ )  $\delta$  7.48 – 6.88 (m, 10H), 5.08 – 5.02 (m, 1H), 4.09 – 4.03 (m, 1H), 3.91 (d,  $J$  = 12.1 Hz, 3H), 3.63 (dd,  $J$  = 12.6, 3.2 Hz, 1H), 3.49 (dd,  $J$  = 12.5, 4.0 Hz, 1H).  $^{13}\text{C}$  NMR (126 MHz,  $\text{CDCl}_3$ )  $\delta$  151.80, 151.41, 147.62, 146.83, 139.79, 139.67, 128.60, 128.50, 128.29, 127.75, 127.18, 126.07, 124.44, 124.40, 121.75, 121.72, 121.32, 121.23, 112.28, 112.23, 89.61, 87.59, 77.32, 77.07, 76.81, 74.17, 72.97, 61.06, 60.63, 55.96, 31.67, 29.71, 0.04.

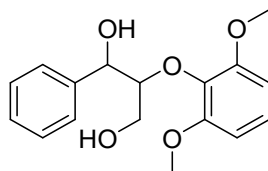2-(2,6-dimethoxyphenoxy)-1-phenylpropane-1,3-diol (**9**)

Data for **9**:  $^1\text{H}$  NMR (500 MHz, Chloroform- $d$ )  $\delta$  7.45 – 7.39 (m, 2H), 7.33 – 7.26 (m, 3H), 7.26 – 7.19 (m, 1H), 7.04 – 6.97 (m, 1H), 6.58 (t,  $J$  = 8.3 Hz, 2H), 5.10 – 5.01 (m, 1H), 4.33 (d,  $J$  = 1.4 Hz, 1H), 3.92 – 3.81 (m, 7H), 3.52 (dt,  $J$  = 12.4, 3.3 Hz, 1H), 3.32 (dd,  $J$  = 9.9, 3.7 Hz, 1H), 3.24 (ddd,  $J$  = 12.4, 9.8, 2.5 Hz, 1H).  $^{13}\text{C}$  NMR (126 MHz,  $\text{CDCl}_3$ )  $\delta$  153.61, 153.29, 140.18, 139.46, 135.33, 134.97, 128.43, 128.36, 128.05, 127.45, 127.39, 125.84, 124.56, 105.35, 88.89, 86.99, 77.34, 77.08, 76.83, 74.29, 72.85, 60.56, 60.46, 56.20, 0.05.

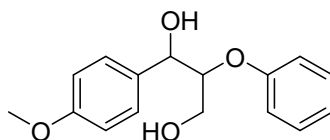1-(4-methoxyphenyl)-2-phenoxypropane-1,3-diol (**10**)

Data for **10**:  $^1\text{H}$  NMR (500 MHz, Chloroform- $d$ )  $\delta$  8.09 (d,  $J$  = 8.9 Hz, 1H), 7.28 (d,  $J$  = 5.7 Hz, 1H), 7.03 – 6.90 (m, 3H), 5.33 (s, 1H), 4.16 (qd,  $J$  = 12.0, 5.2 Hz, 1H), 3.90 (s, 2H), 1.46 (d,  $J$  = 8.5 Hz, 4H), 1.38 – 1.25 (m, 5H).  $^{13}\text{C}$  NMR (126 MHz, Chloroform- $d$ )  $\delta$  159.65, 159.37, 158.13, 157.68, 132.41, 131.68, 129.80, 129.70, 128.24, 127.60, 127.52, 122.08, 121.91, 116.64, 116.59, 114.08, 113.99, 83.26, 81.92, 73.89, 73.70, 61.40, 61.14, 55.35.

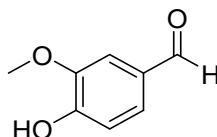

## 2-Methoxy-4-formylphenol (Vanillin)

Data for Vanillin:  $^1\text{H}$  NMR (400 MHz,  $\text{CDCl}_3$ )  $\delta$  9.83 (d,  $J$  = 1.8 Hz, 1H), 7.43 (t,  $J$  = 3.9 Hz, 2H), 7.05 (dd,  $J$

## SUPPORTING INFORMATION

---

= 8.4, 1.9 Hz, 1H), 6.39 (d,  $J$  = 1.9 Hz, 1H), 3.96 (d,  $J$  = 1.9 Hz, 3H).  $^{13}\text{C}$  NMR (101 MHz,  $\text{CDCl}_3$ )  $\delta$  190.99, 151.77, 147.21, 129.87, 127.57, 114.44, 108.84, 77.37, 77.06, 76.74, 56.13, -0.03.

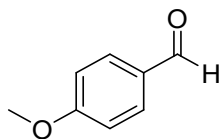

4-methoxybenzaldehyde (p-Anisaldehyde)

Data for p-Anisaldehyde:  $^1\text{H}$  NMR (400 MHz,  $\text{CDCl}_3$ )  $\delta$  9.88 (s, 1H), 7.83 (d,  $J$  = 8.3 Hz, 2H), 7.00 (d,  $J$  = 8.3 Hz, 2H), 3.88 (s, 3H).  $^{13}\text{C}$  NMR (101 MHz,  $\text{CDCl}_3$ )  $\delta$  190.81, 164.62, 131.97, 129.95, 121.94, 114.32, 113.65, 77.45, 77.13, 76.81, 55.56.

## 4. Mechanistic Experiments

## 4.1 Control experiments

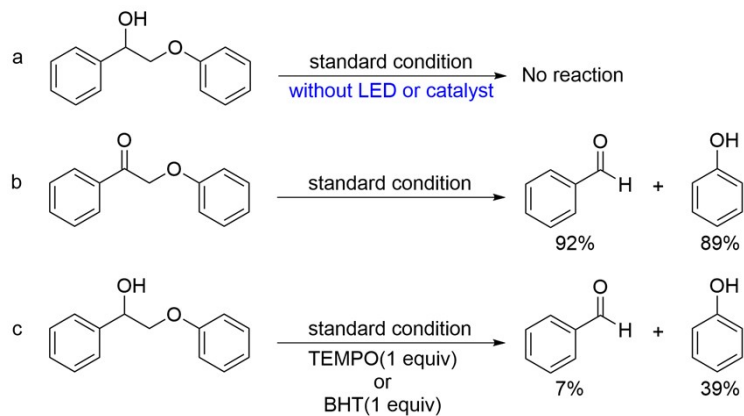**Scheme S6.** Controlled experiments.

Standard conditions: substrate (0.1 mmol), Amberlyst 15 (0.2 eq), MeCN (2.0 mL), 1 atm O<sub>2</sub>, rt, 12 h, 40W blue LED (400-410nm).

**Table S2.** Effect of catalyst amount on reaction.

| Entry | Catalyst dosage<br>(equivalent) | The amount of<br>substance(mmol) | mass<br>(g) | Conv.<br>(%) | Yield 1b<br>(%) | Yield 1c<br>(%) |
|-------|---------------------------------|----------------------------------|-------------|--------------|-----------------|-----------------|
| 1     | 0                               | 0                                | 0           | 0            | 0               | 0               |
| 2     | 0.05                            | 0.005                            | 0.016       | 40           | 23              | 23              |
| 3     | 0.1                             | 0.01                             | 3.144       | 80           | 41              | 52              |
| 4     | 0.15                            | 0.015                            | 4.716       | 89           | 73              | 74              |
| 5     | 0.2                             | 0.02                             | 6.288       | 95           | 92              | 89              |
| 6     | 0.25                            | 0.025                            | 7.860       | 93           | 89              | 86              |
| 7     | 0.3                             | 0.03                             | 9.432       | 93           | 90              | 87              |
| 8     | 0.35                            | 0.035                            | 11.004      | 92           | 88              | 86              |
| 9     | 0.4                             | 0.04                             | 12.576      | 92           | 90              | 87              |

Reaction time 12 h, the other reaction conditions are the same as Table s1.

**Table S3.** Effect of reaction time on reaction.

| Entry | Time | Conv. | Yield 1b | Yield 1c |
|-------|------|-------|----------|----------|
|       | (h)  | (%)   | (%)      | (%)      |
| 1     | 0    | 0     | 0        | 0        |

## SUPPORTING INFORMATION

|    |    |    |    |    |
|----|----|----|----|----|
| 2  | 1  | 20 | 15 | 12 |
| 3  | 2  | 27 | 18 | 17 |
| 4  | 3  | 30 | 20 | 21 |
| 5  | 4  | 35 | 22 | 23 |
| 6  | 5  | 43 | 27 | 25 |
| 7  | 6  | 49 | 33 | 30 |
| 8  | 7  | 54 | 42 | 41 |
| 9  | 8  | 62 | 52 | 54 |
| 10 | 9  | 80 | 62 | 66 |
| 11 | 10 | 88 | 70 | 72 |
| 12 | 11 | 92 | 83 | 85 |
| 13 | 12 | 95 | 92 | 89 |
| 14 | 13 | 95 | 90 | 88 |
| 15 | 14 | 96 | 90 | 88 |
| 16 | 15 | 96 | 89 | 87 |

### 4.2 Electron paramagnetic resonance (EPR) spectroscopy experiments

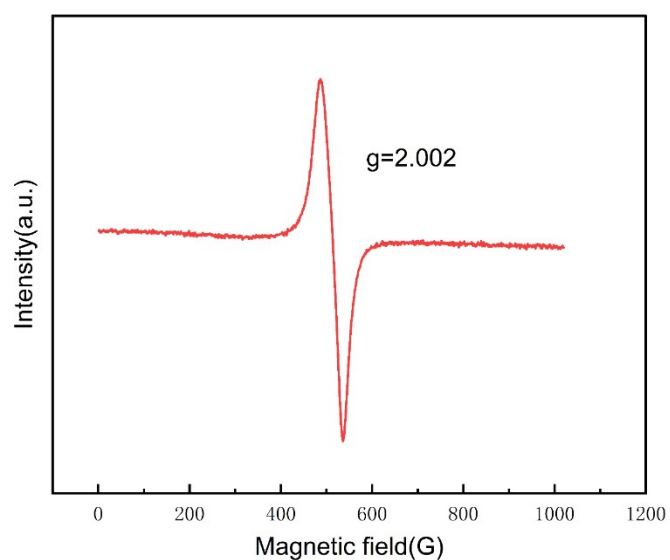

**Figure S2.** Electron paramagnetic resonance (EPR) spectra. Center Field: 500.00 G (adjusted to match the peak position in the spectrum), Sweep Width: 1000.0 G, Power: 6.325 mW, Power Atten: 15.0 dB, Frequency: 9.830200 GHz, Sweep Time: 30.00 s, Modulation Amplitude: 1.000 G, Modulation Frequency: 100.00 kHz.

### 4.3 Detection of CO<sub>2</sub>

Under the environment of pure oxygen, tail gas was collected and detected by GC.

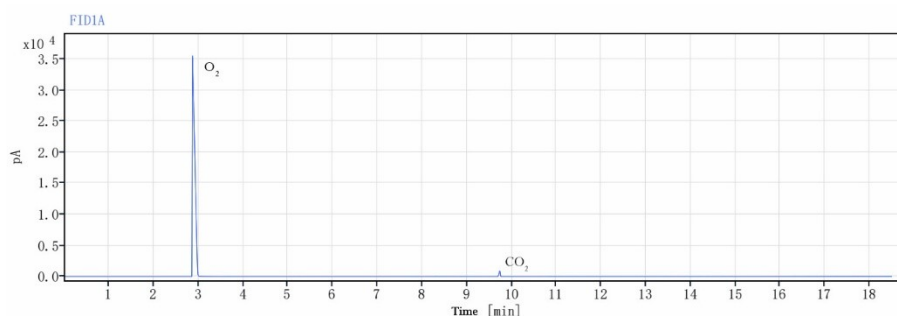

**Figure S3.** GC profile of the gas phase of the reaction solution.

### 4.4 Carbon mass balance

In order to verify the quantitative reliability of the depolymerization reaction of  $\beta$ -O-4 LMC and clarify the source of the yield deviation between benzaldehyde (1b) and phenol (1c), the carbon flow direction of the reaction was systematically analyzed by carbon mass balance calculation, qualitative and quantitative analysis of by-products and separation loss verification.

$$\text{Carbon recovery rate(\%)} = \frac{\sum \text{Carbon Mass of Each Product (mg)}}{\text{Initial Carbon Mass of Substrate (mg)}} \times 100\% \quad (3)$$

**Table S4.** Carbon Distribution of Main Products and By-Products

| Form of Carbon Existence          | Substance Name                                  | Molar Yield (%) | Number of C Atoms | Carbon Mass (mg) | Carbon Fraction (%) |
|-----------------------------------|-------------------------------------------------|-----------------|-------------------|------------------|---------------------|
| 1b                                | Benzaldehyde                                    | 92              | 7                 | 7.728            | 46.0                |
| 1c                                | Phenol                                          | 89              | 6                 | 6.408            | 38.1                |
| Quantified by-product             | Benzoic acid (mild oxidation)                   | 1.5             | 7                 | 0.126            | 0.75                |
| Quantified by-product             | Benzyl alcohol (reduction by-product)           | 0.8             | 7                 | 0.0672           | 0.4                 |
| Separation loss                   | Column chromatography adsorption/volatilization | -               | -                 | 1.4708           | 8.75                |
| Total initial carbon of substrate | -                                               | -               | -                 | 16.8             | 100                 |
| Total recovered carbon            | -                                               | -               | -                 | 15.792           | 94.0%               |

Standard conditions: substrate (0.1 mmol), Amberlyst 15 (0.2 eq), MeCN (2.0 mL), 1 atm O<sub>2</sub>, rt, 12 h, 40W blue LED (400-410nm).

Carbon mass of each product = molar amount of product  $\times$  number of C atoms in product  $\times$  12 g/mol; initial carbon mass of substrate = 16.8 mg (fixed value).



## 5. Degradation of natural lignin

### 5.1 Extraction of lignin

We charged a round bottom flask with 10.3 g poplar sawdust, 50 mL 1,4-dioxane, and 1.75 mL HCl (37wt%), and heated to reflux at 85 °C in oil bath for 3 h. After cooling to rt, the mixture was added with 3.36 g sodium bicarbonate ( $\text{NaHCO}_3$ ), stirred for another 30 min, after which it was filtered and washed with 10 mL of dioxane. Then the solution was concentrated at 40 °C under reduced pressure. The resulting dark-brown oil was diluted with 30 mL ethyl acetate (EtOAc) and added dropwise to 500 mL of hexane to precipitate the lignin. After filtration, the collected lignin was washed with hexane (50 mL). The recovered lignin was dried overnight at rt in a desiccator to afford 1.36 g poplar lignin<sup>2</sup>. At the same time, it was subjected to two-dimensional nuclear magnetic HSQC detection (Figure.S4).

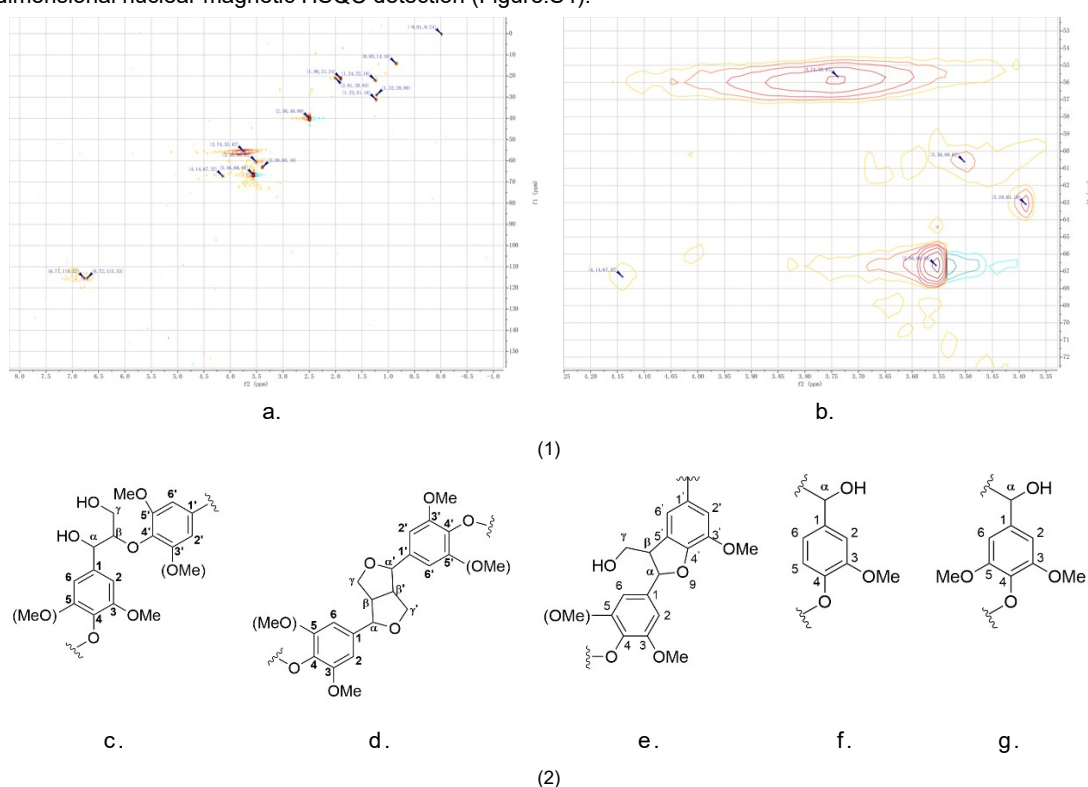

**Figure S4.** (1) HSQC results. (2) Several lignin structural units analyzed: c.  $\beta$ -O-4 linkages, d.  $\beta$ - $\beta$  resinol structural units, e.  $\beta$ -5 units, f. Guaiacyl (G) units, g. Syringyl (S) units

### 5.2 Gel Permeation Chromatography (GPC) test results of poplar lignin samples

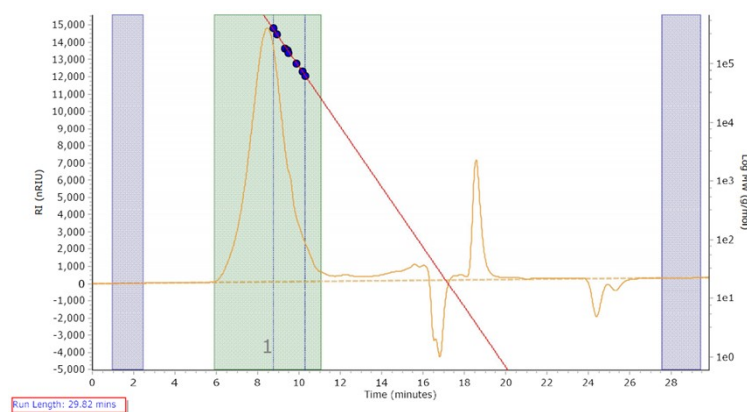

a.

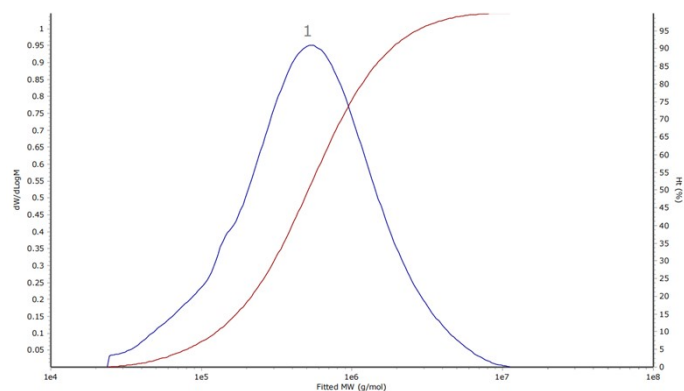

b.

**Figure S5.** Gel Permeation Chromatography (GPC) test

Polystyrene was used as the standard, NMP was used as the mobile phase, the sample concentration was 2mg / ml, the flow rate was 0.6ml / min, and the injection volume was 20 $\mu$ L. Agilent GPC/SEC Software (version A.02.02 [281]) and Instrument 1 instrument were used with RI concentration detector. The total running time of the sample was 29.82 minutes.

The calibration curve was  $y = -0.5129x + 10.07$ , and the linear correlation coefficient was -0.998921. The calibration molecular weight range was 61800-403200 g / mol, and the Mark-Houwink equation was used for auxiliary correction. The equation parameters were  $K = 14.100 \times 10 \text{ dL/g}$  and  $\alpha = 0.700$ .

Number average molecular weight (Mn) 12855 g / mol, weight average molecular weight (Mw) 18268 g / mol, peak molecular weight (Mp) 15308 g / mol, viscosity average molecular weight (Mv) 17149 g / mol, z average molecular weight (Mz) 19872 g / mol, z + 1 average molecular weight (Mz+1) 23652 g / mol, polydispersity index (PD) 2.096.

## 5.3 Depolymerization of lignin

A total of 100 mg poplar lignin and 20 mg Amberlyst 15 were placed in four test tubes, and 2 mL acetonitrile was added to each test tube. The reaction system was irradiated for 12 hours under two 400-410 nm LEDs. After the reaction, HCl was used for acidification, and the solid material was removed by suction filtration. The reaction product was extracted with CH<sub>2</sub>Cl<sub>2</sub>, and the product was detected by GC-MS and quantitatively analyzed by GC. The solid residue was dissolved in deuterated dimethyl sulfoxide for two-dimensional nuclear magnetic HSQC detection (Figure.S6).

The reaction scheme shows the conversion of sawdust to a specific substituted benzaldehyde derivative. Sawdust is first extracted to yield lignin. Lignin is then treated with Amberlyst 15 resin under blue LED light to produce 5-methoxy-2-hydroxy-3-(hydroxymethyl)benzaldehyde in 5.9 wt% yield. The chemical structure of the product is shown as a benzene ring with an aldehyde group (-CHO) at position 1, a methoxy group (-OCH<sub>3</sub>) at position 5, a hydroxyl group (-OH) at position 2, and a hydroxymethyl group (-CH<sub>2</sub>OH) at position 3.

#### 5.4 GC-MS analysis of real lignin depolymerization products

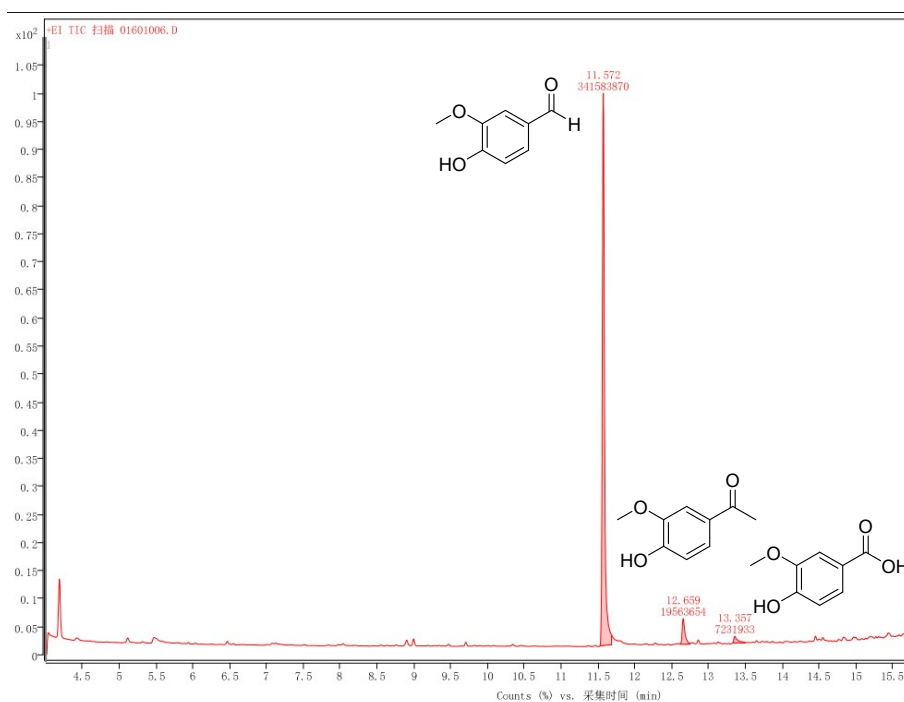

a

# SUPPORTING INFORMATION

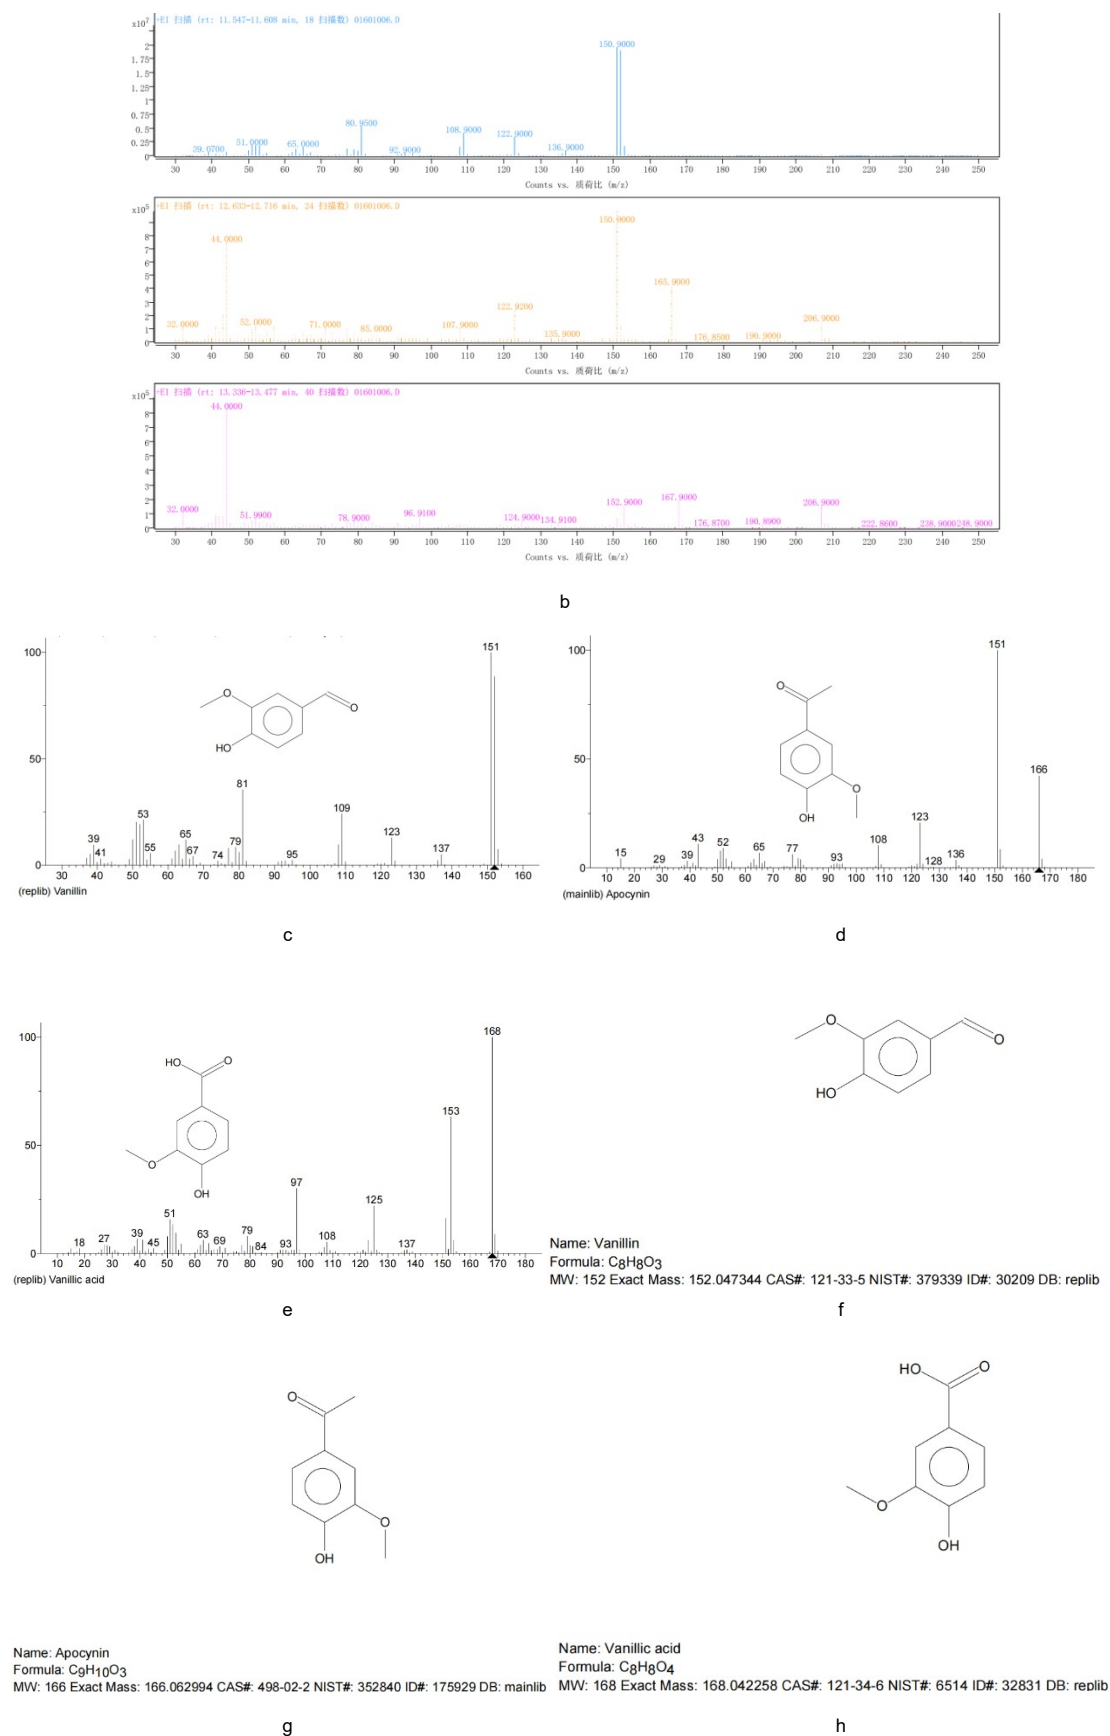

## SUPPORTING INFORMATION

### 6. $^1\text{H}$ NMR and $^{13}\text{C}$ NMR spectra of compounds

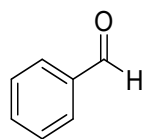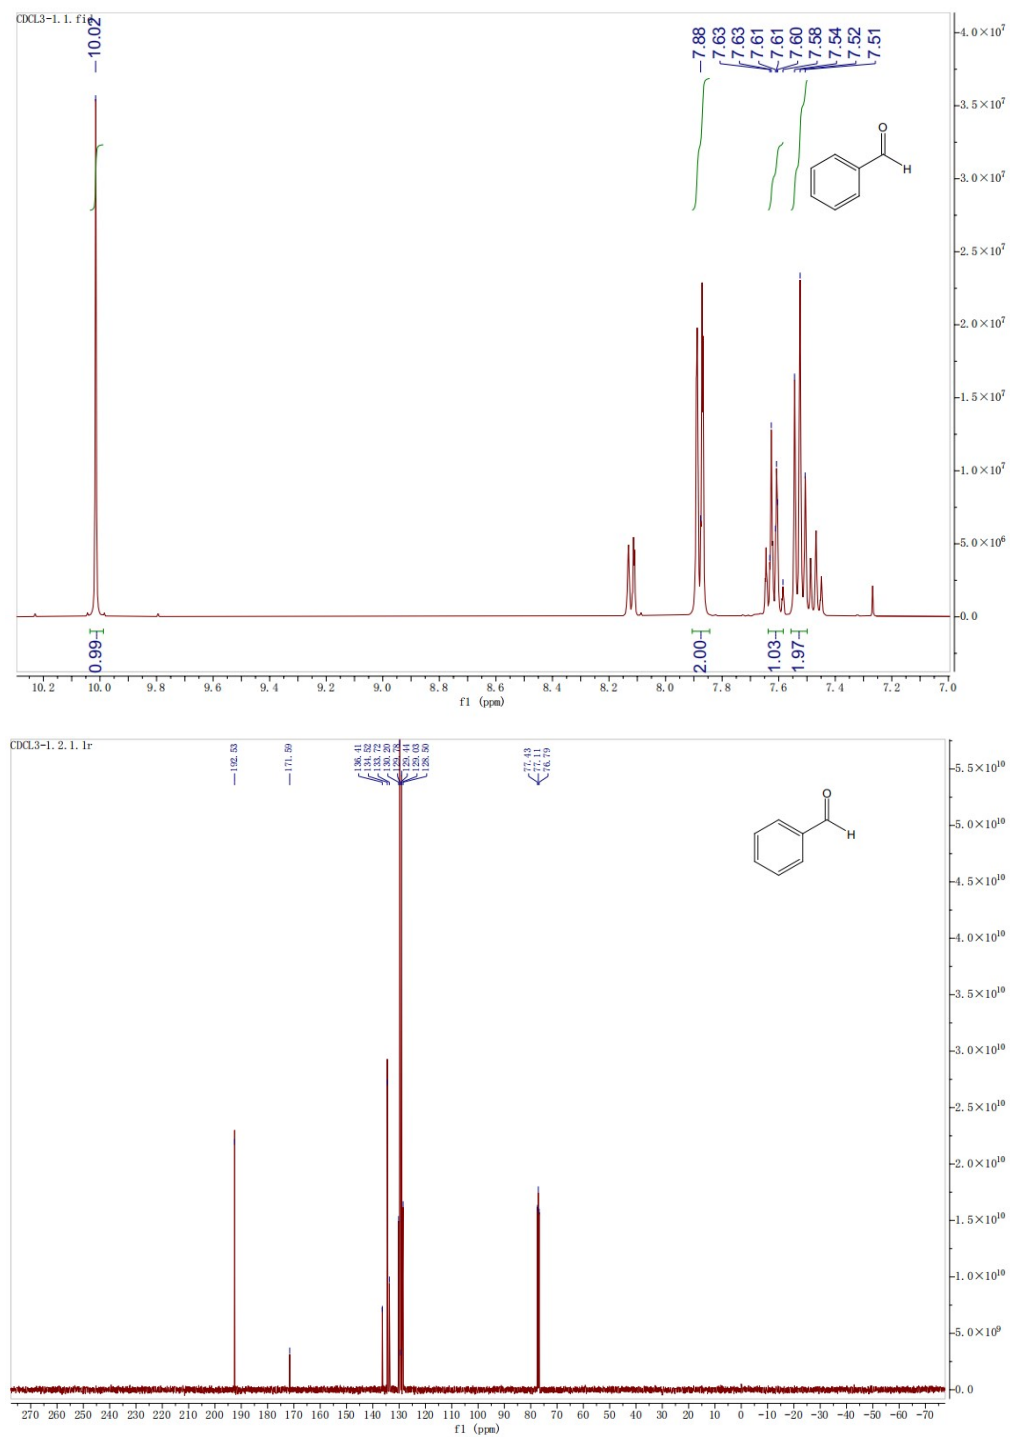

Figure S9  $^1\text{H}$  (top) and  $^{13}\text{C}$  (bottom) NMR spectra of Benzaldehyde.

# SUPPORTING INFORMATION

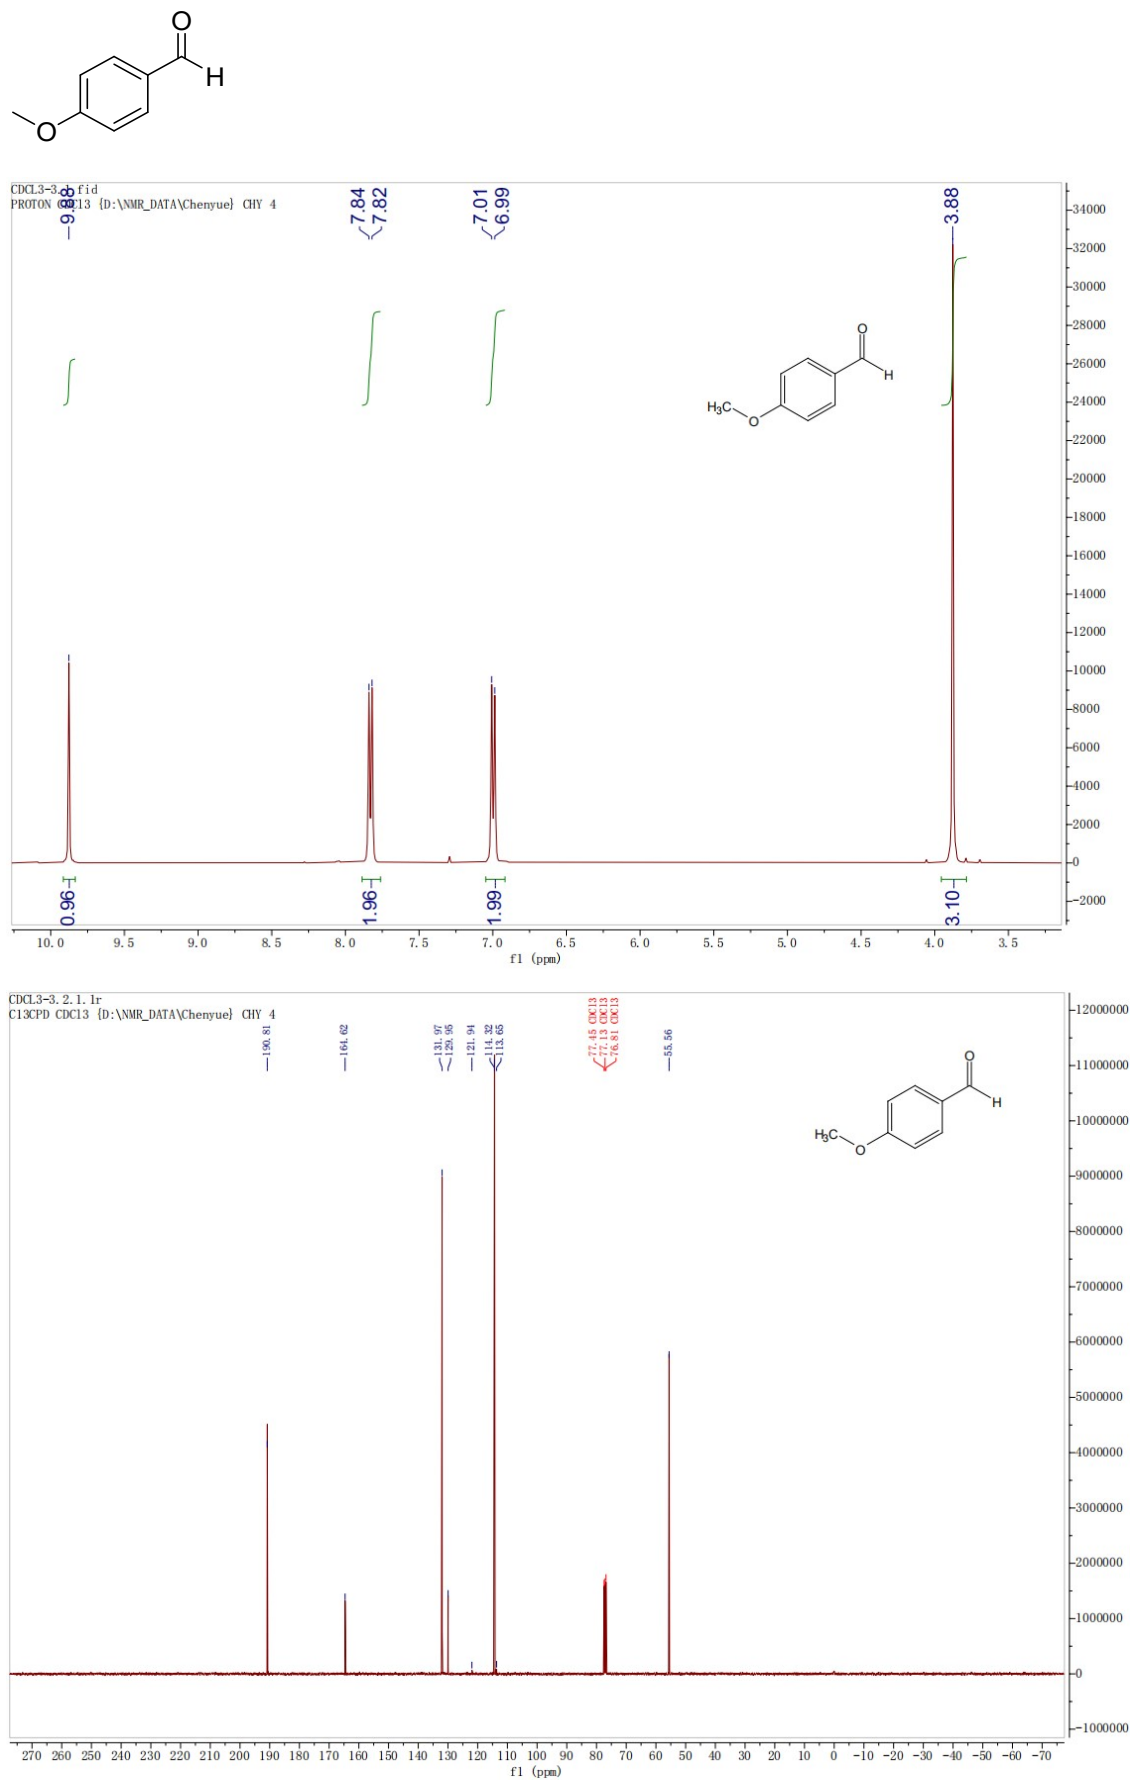

Figure S10 <sup>1</sup>H (top) and <sup>13</sup>C (bottom) NMR spectra of 4-methoxybenzaldehyde.

# SUPPORTING INFORMATION

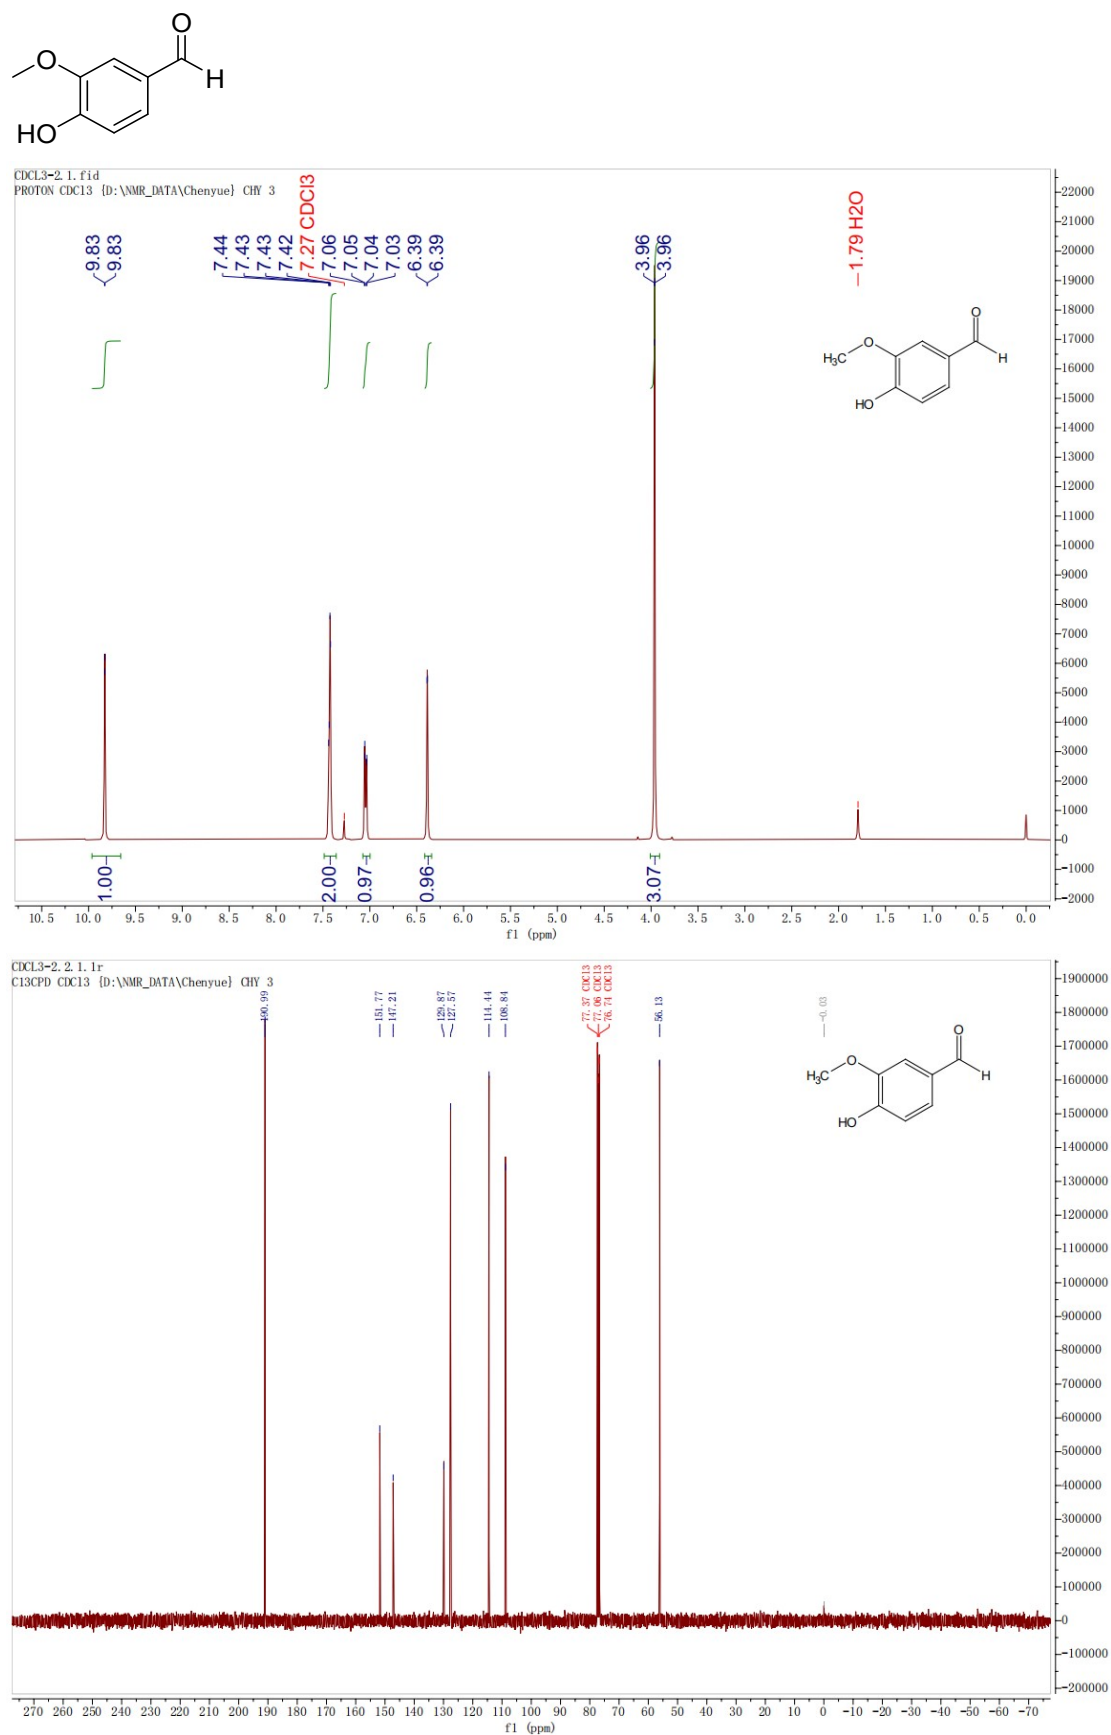

Figure S11 <sup>1</sup>H (top) and <sup>13</sup>C (bottom) NMR spectra of Vanillin.

# SUPPORTING INFORMATION

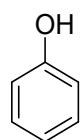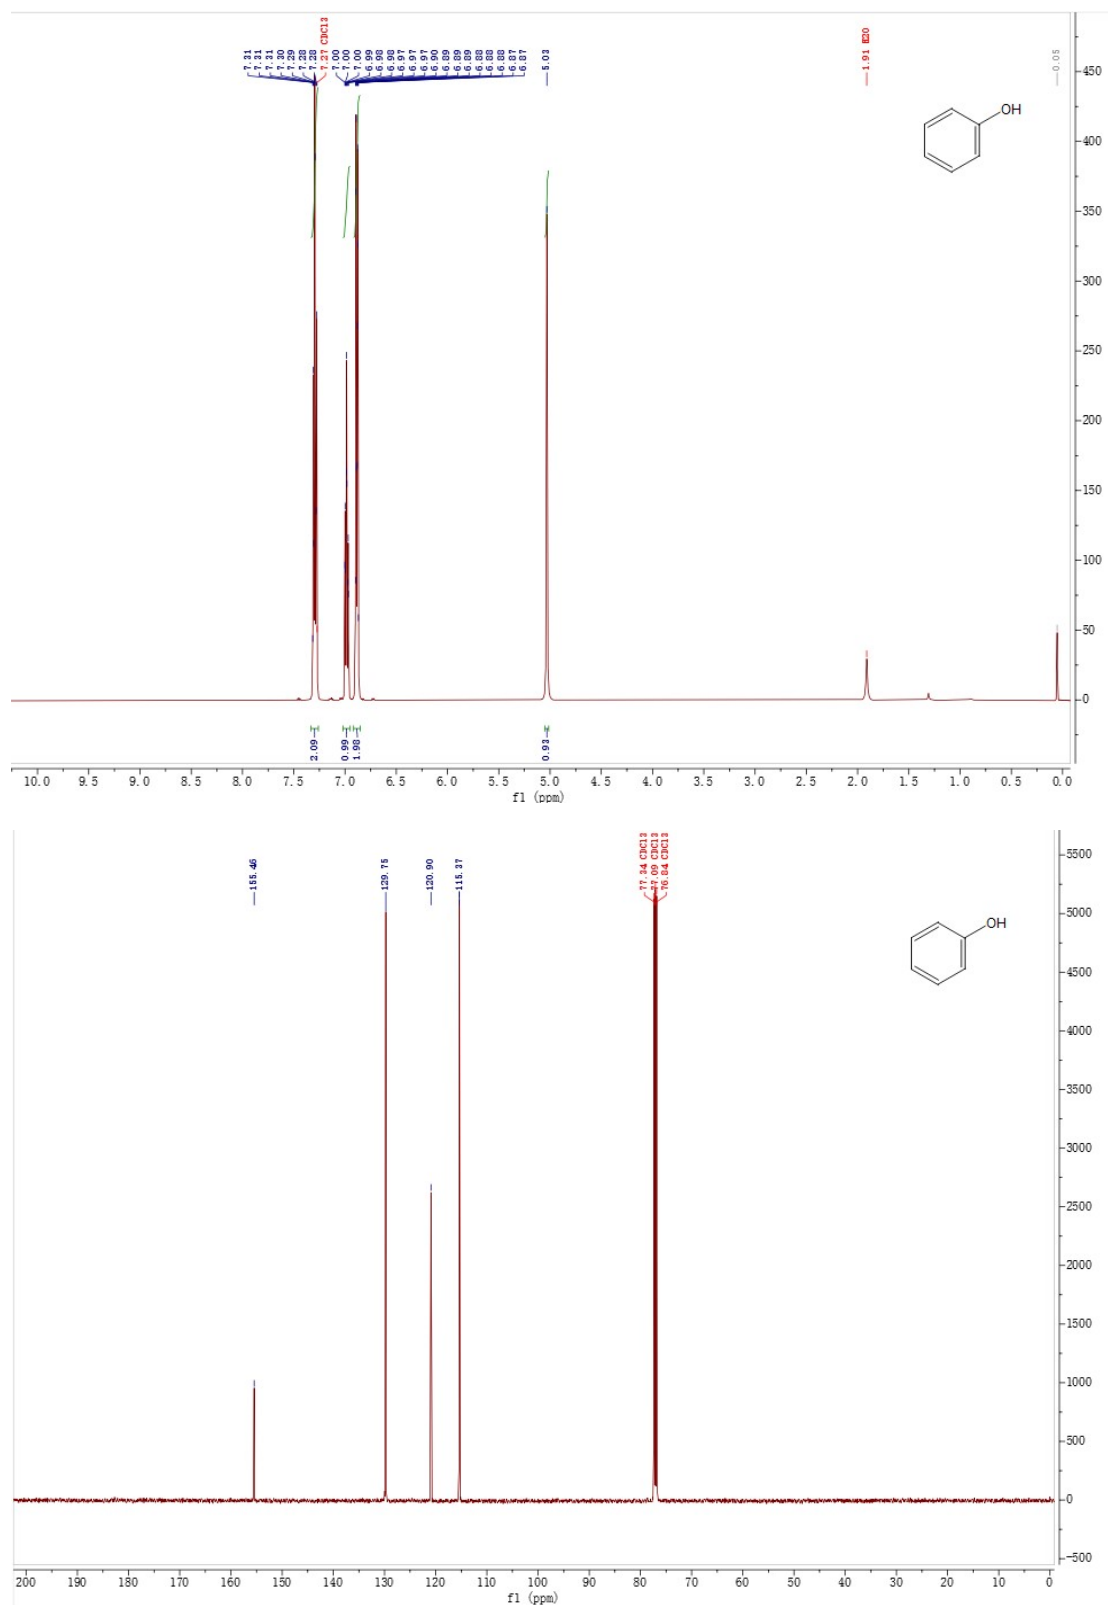

Figure S12 <sup>1</sup>H (top) and <sup>13</sup>C (bottom) NMR spectra of Phenol.



# SUPPORTING INFORMATION

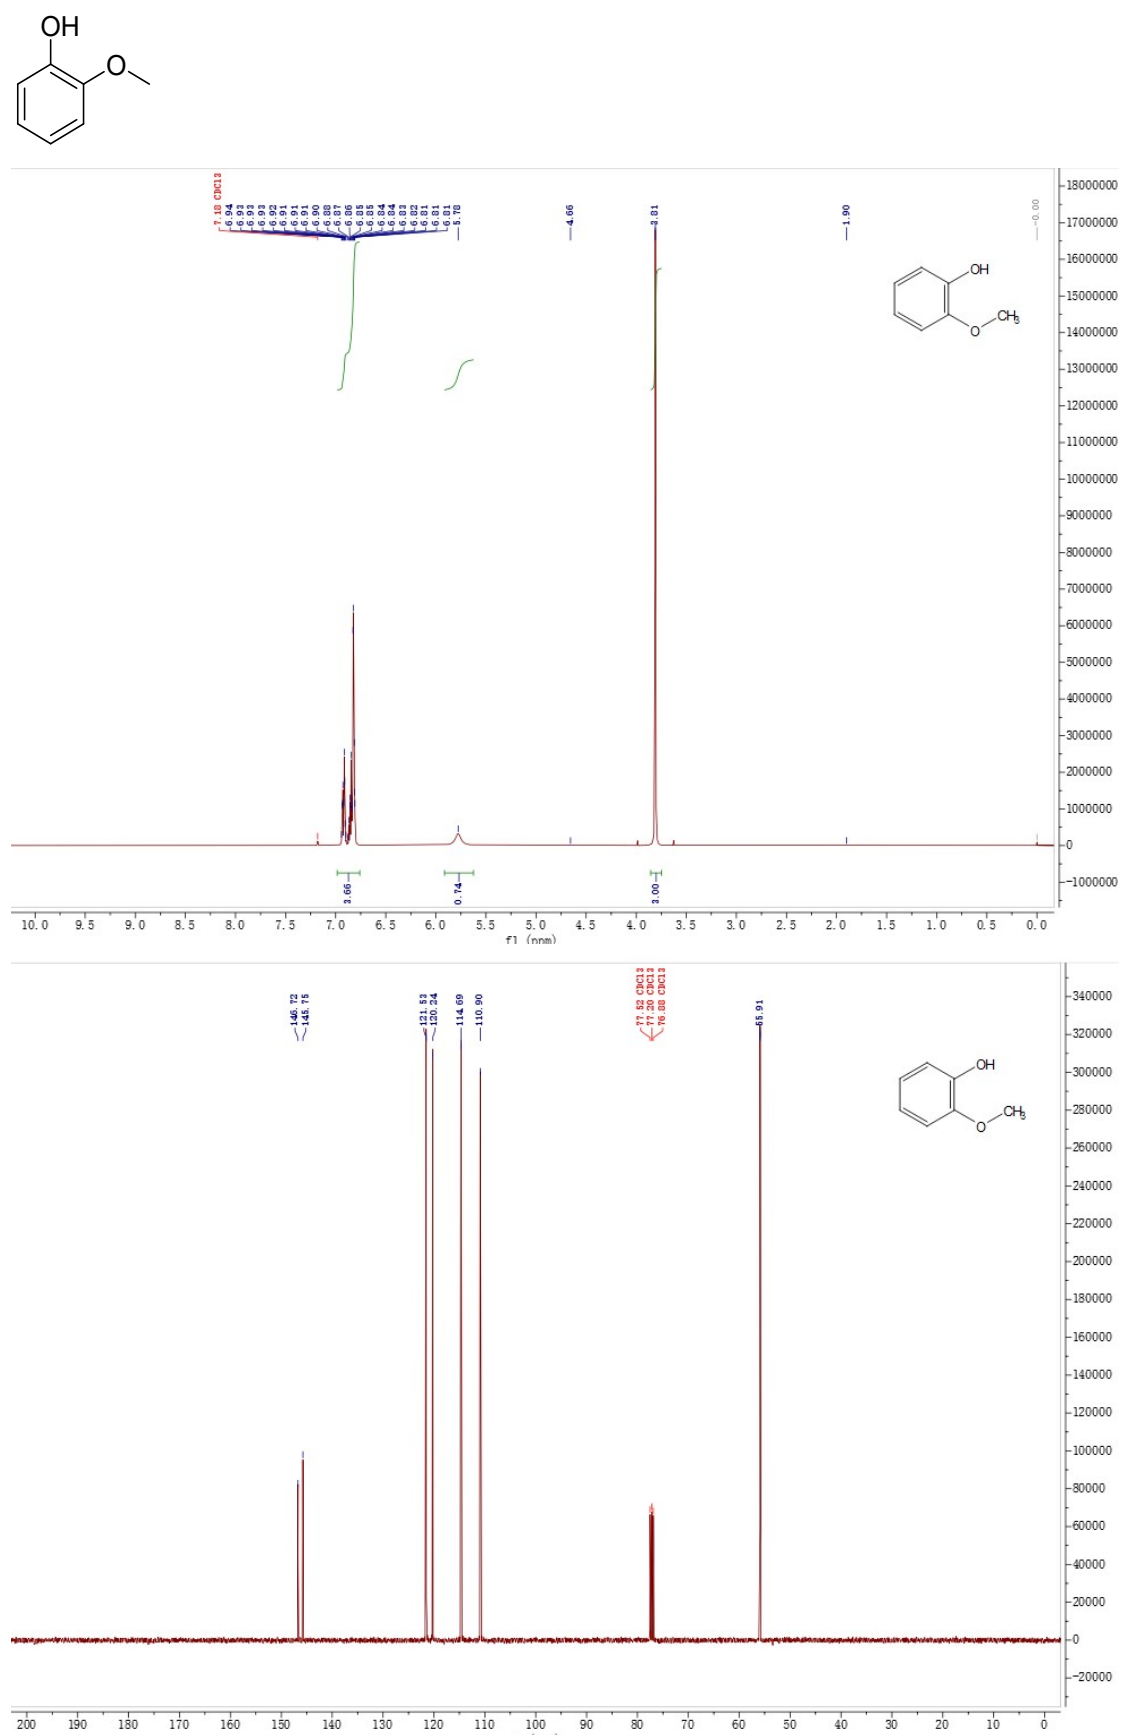

**Figure S13** <sup>1</sup>H (top) and <sup>13</sup>C (bottom) NMR spectra of Guaiacol.

# SUPPORTING INFORMATION

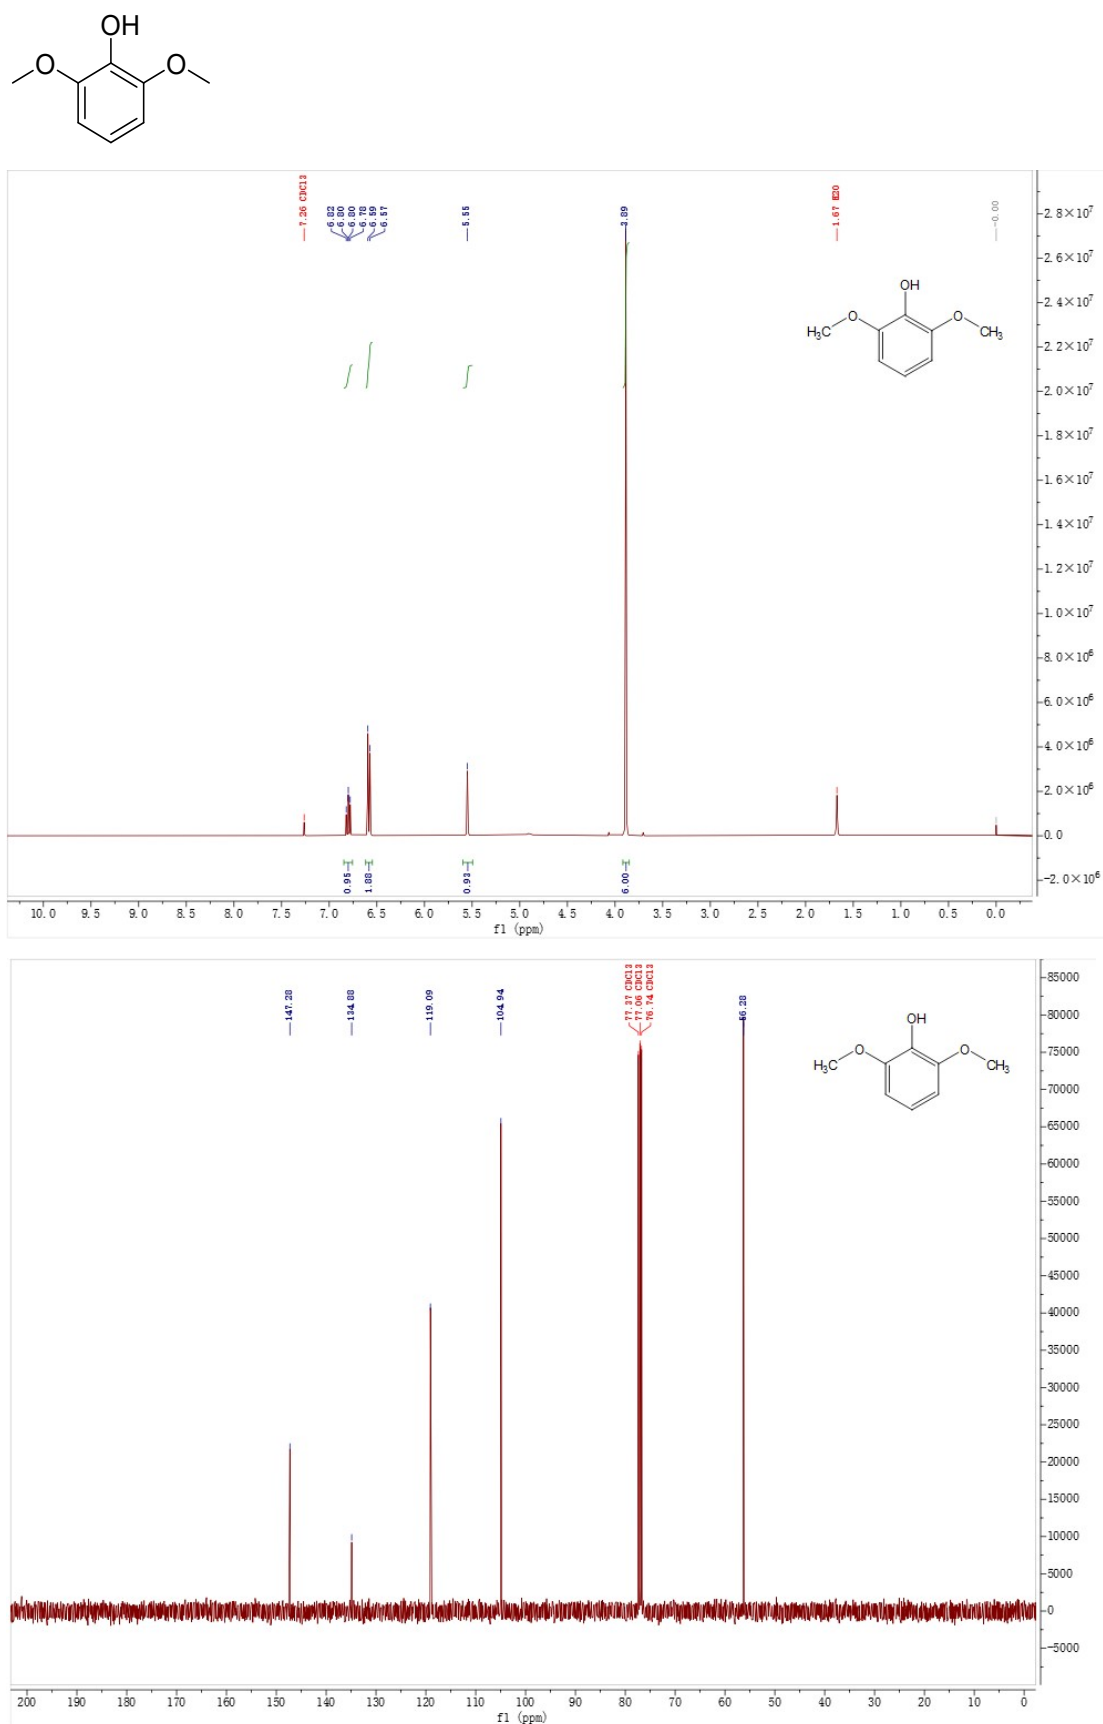

**Figure S14**  $^1\text{H}$  (top) and  $^{13}\text{C}$  (bottom) NMR spectra of 2,6-Dimethoxyphenol.



# SUPPORTING INFORMATION

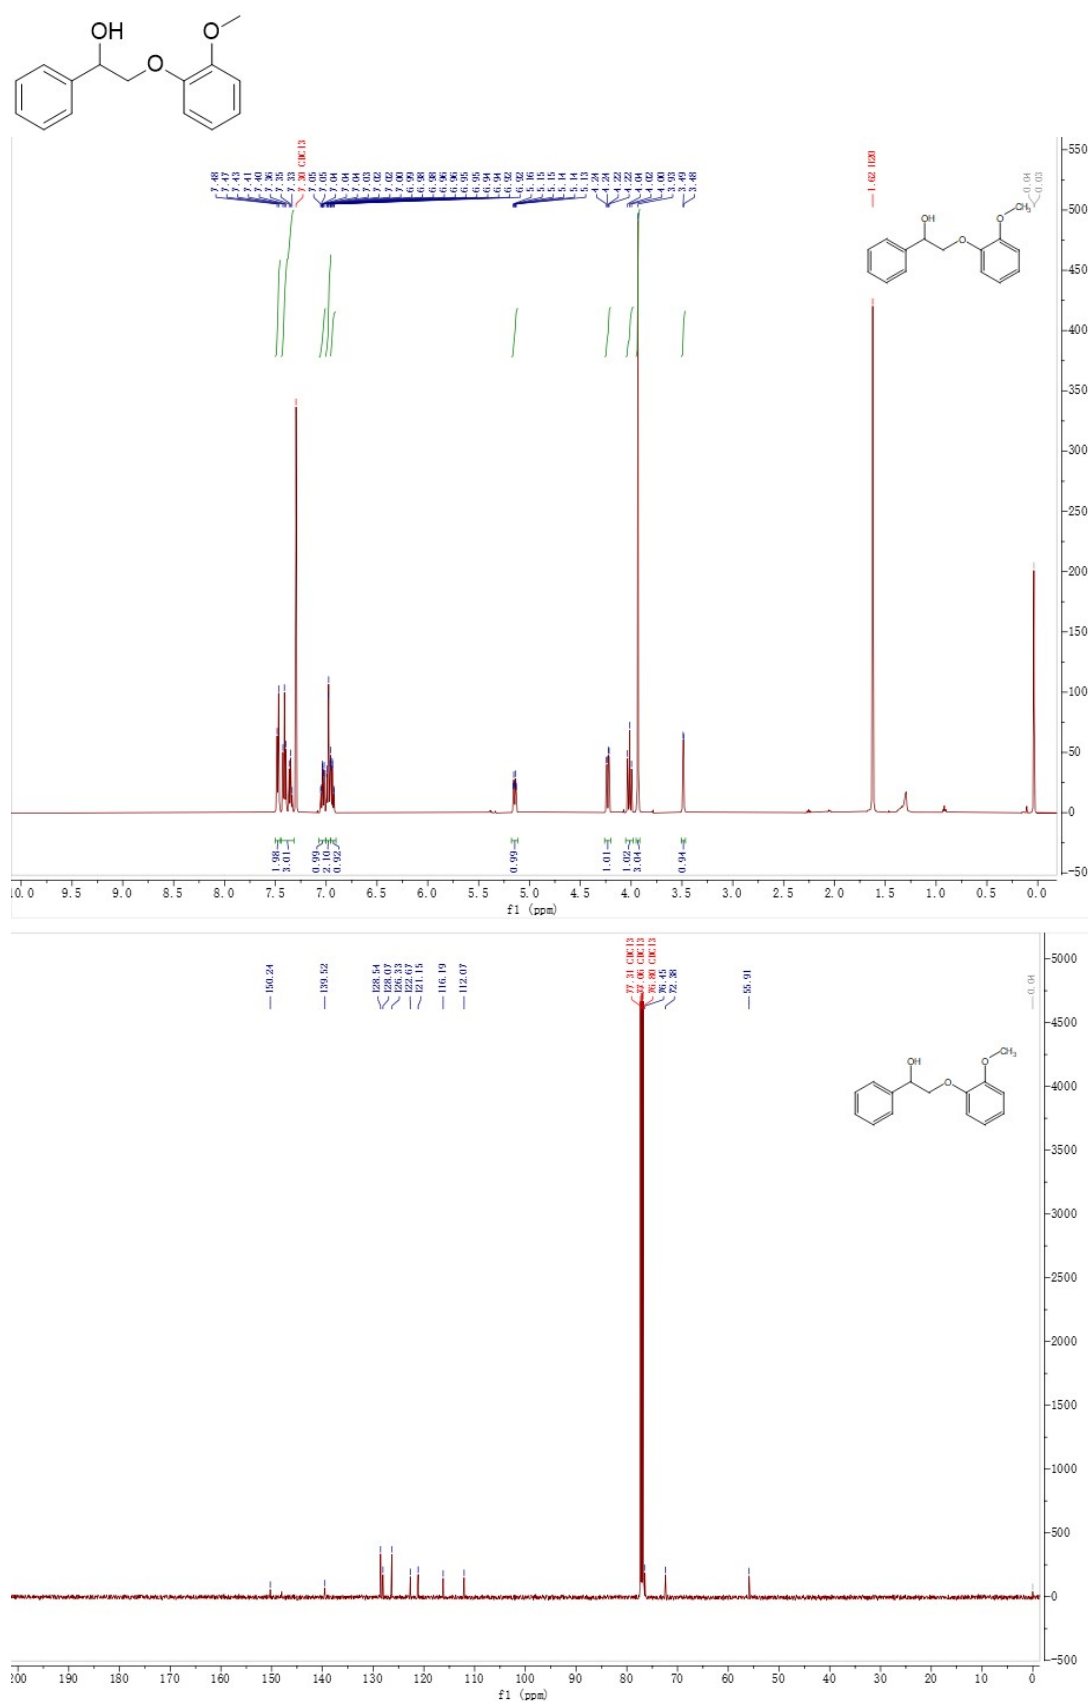

**Figure S16**  $^1\text{H}$  (top) and  $^{13}\text{C}$  (bottom) NMR spectra of 2-(2-methoxyphenoxy)-1-phenylethan-1-ol.

# SUPPORTING INFORMATION

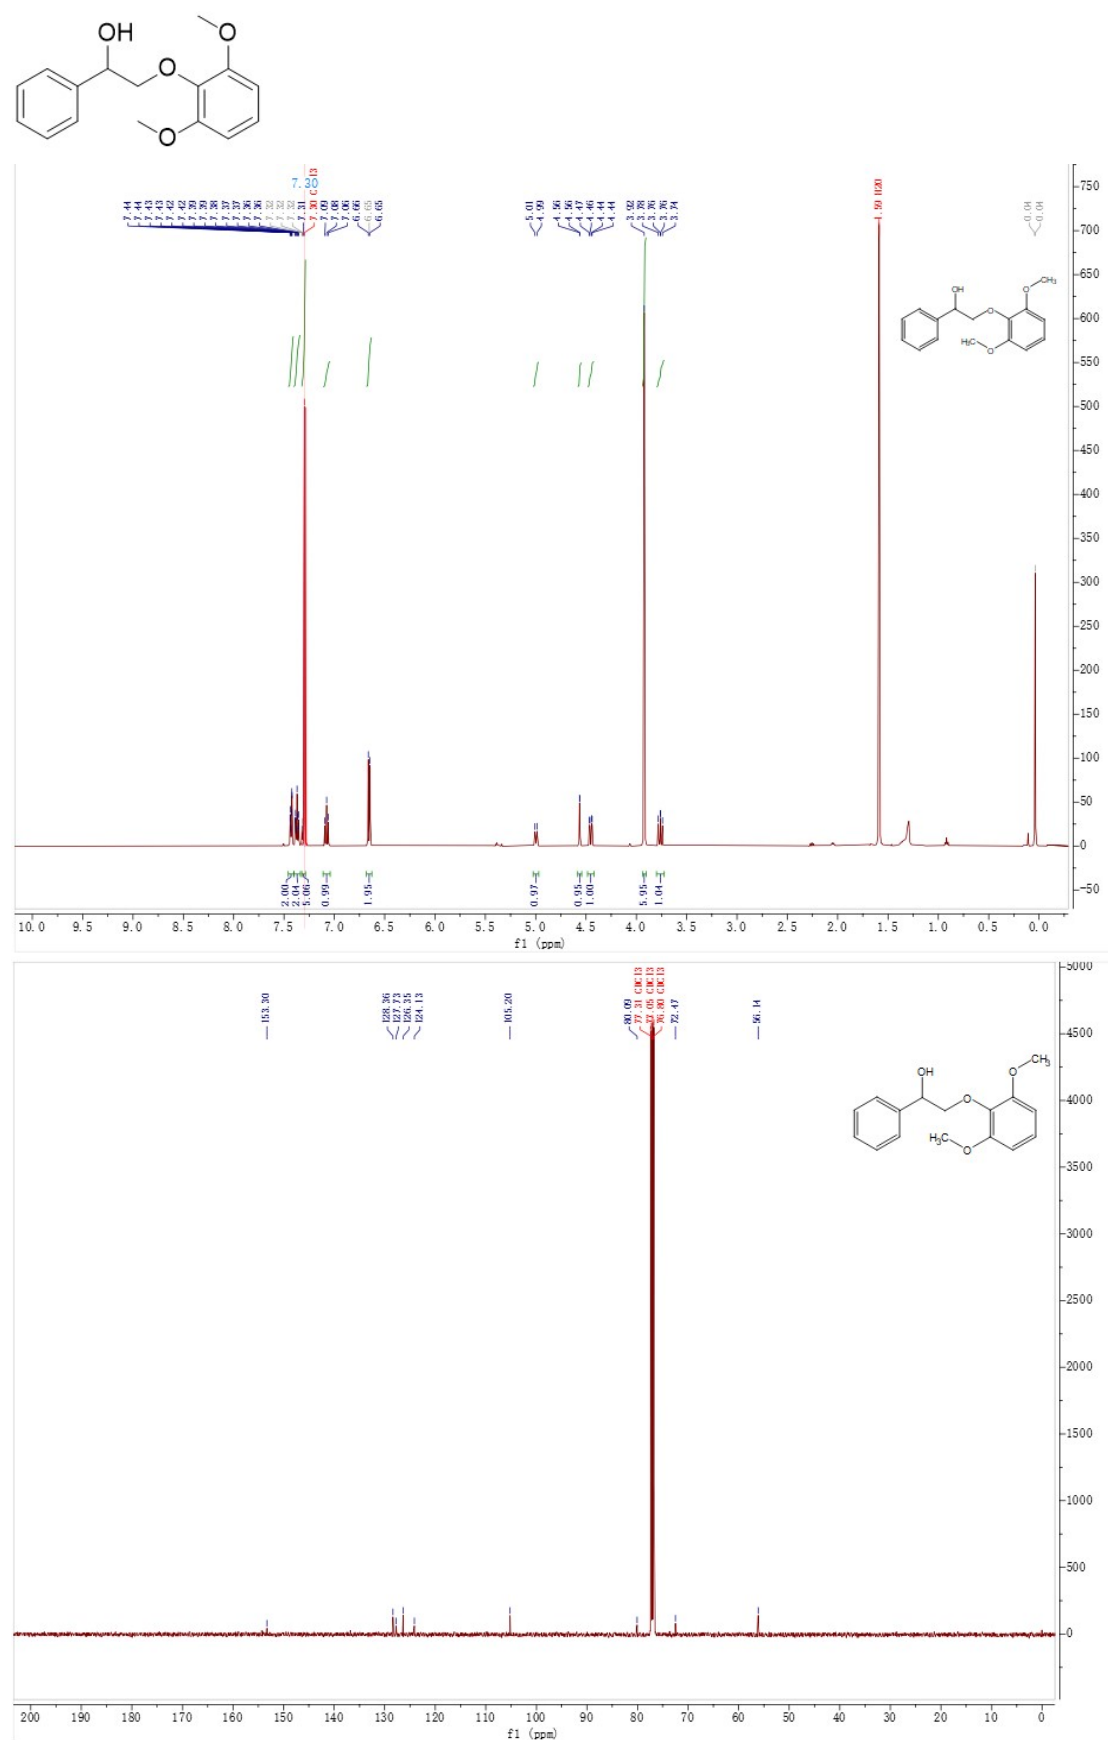

**Figure S17** <sup>1</sup>H (top) and <sup>13</sup>C (bottom) NMR spectra of 2-(4-chlorophenoxy)-1-phenylethan-1-ol.

# SUPPORTING INFORMATION

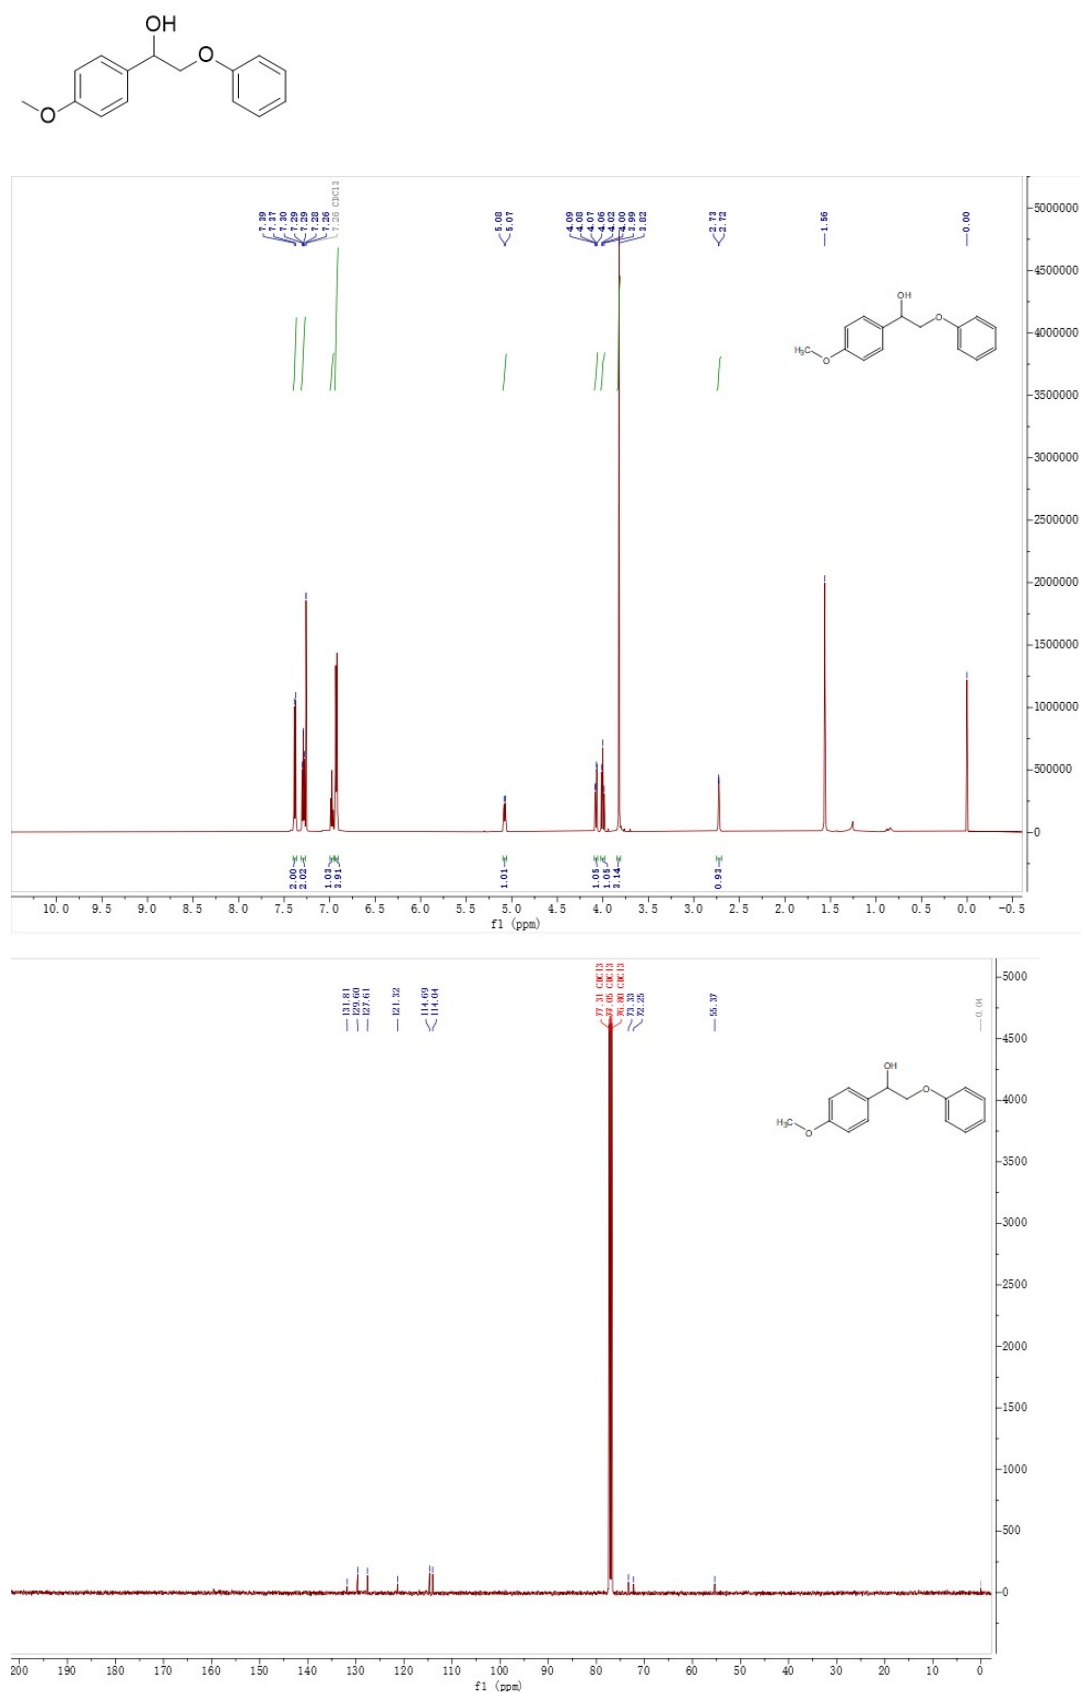

**Figure S18** <sup>1</sup>H (top) and <sup>13</sup>C (bottom) NMR spectra of 1-(4-methoxyphenyl)-2-phenoxyethan-1-ol.

# SUPPORTING INFORMATION

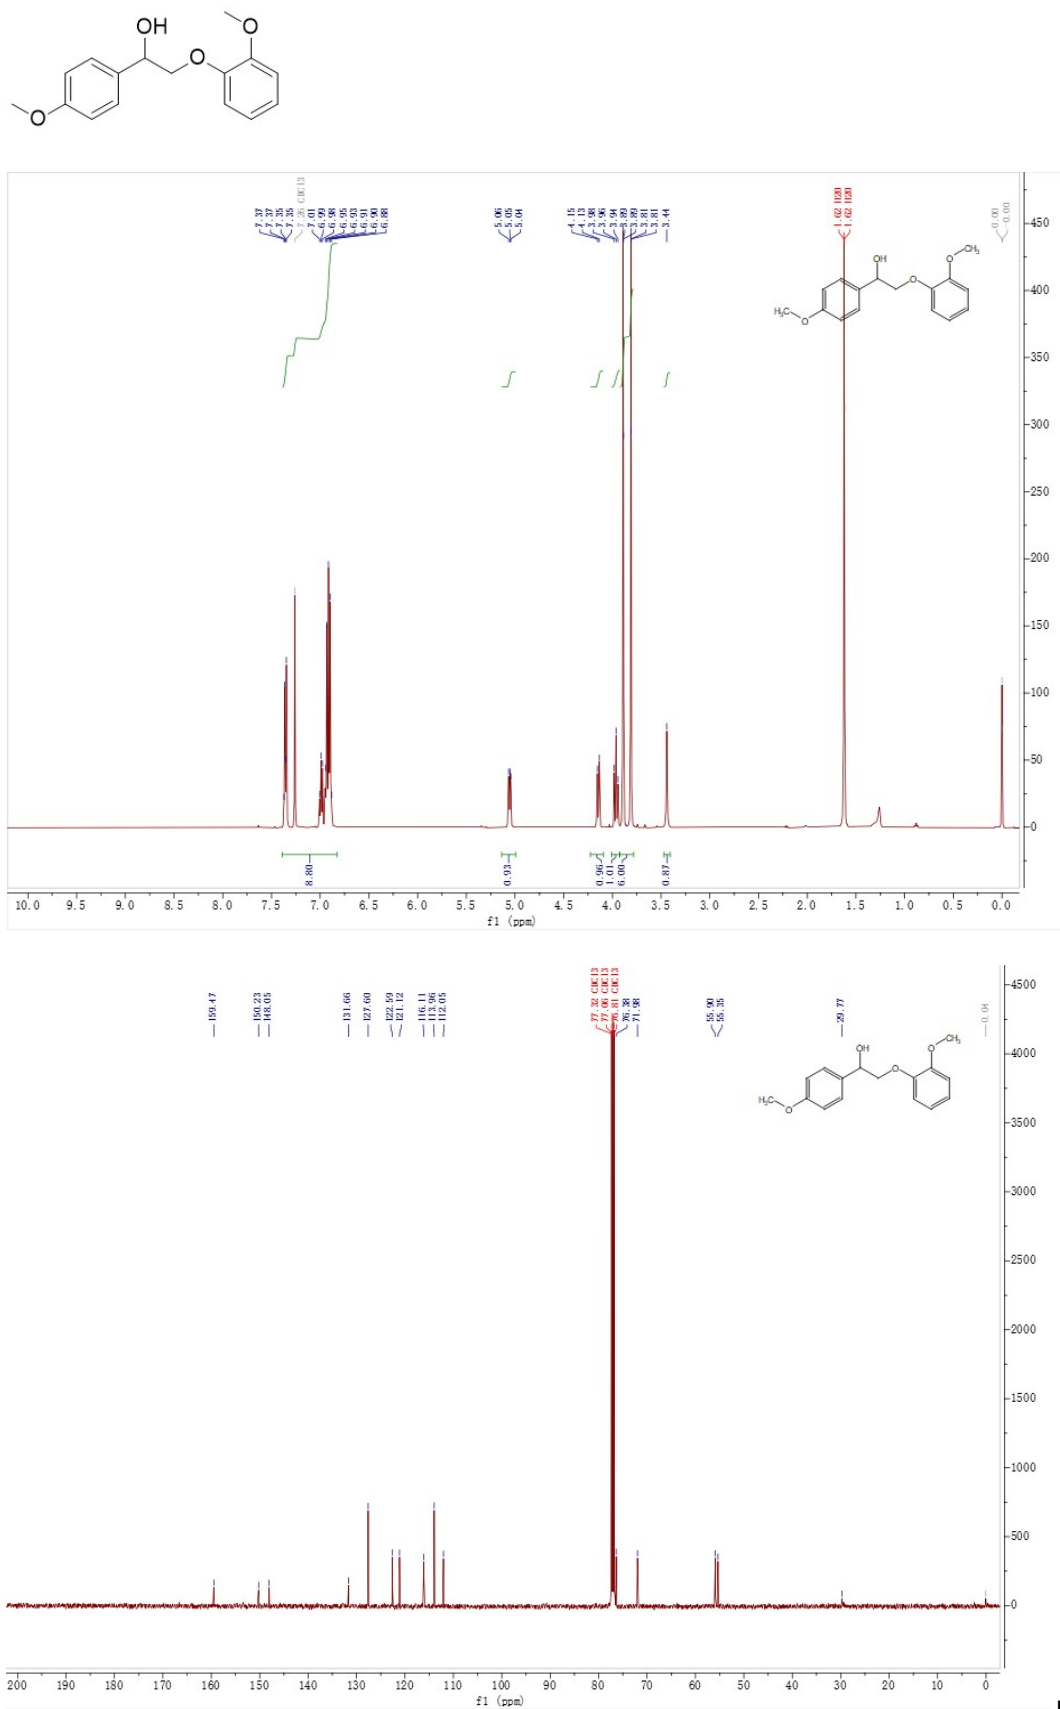

Figure

**S19** <sup>1</sup>H (top) and <sup>13</sup>C (bottom) NMR spectra of 2-(2-methoxyphenoxy)-1-(4-methoxyphenyl) ethanol.

# SUPPORTING INFORMATION

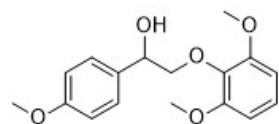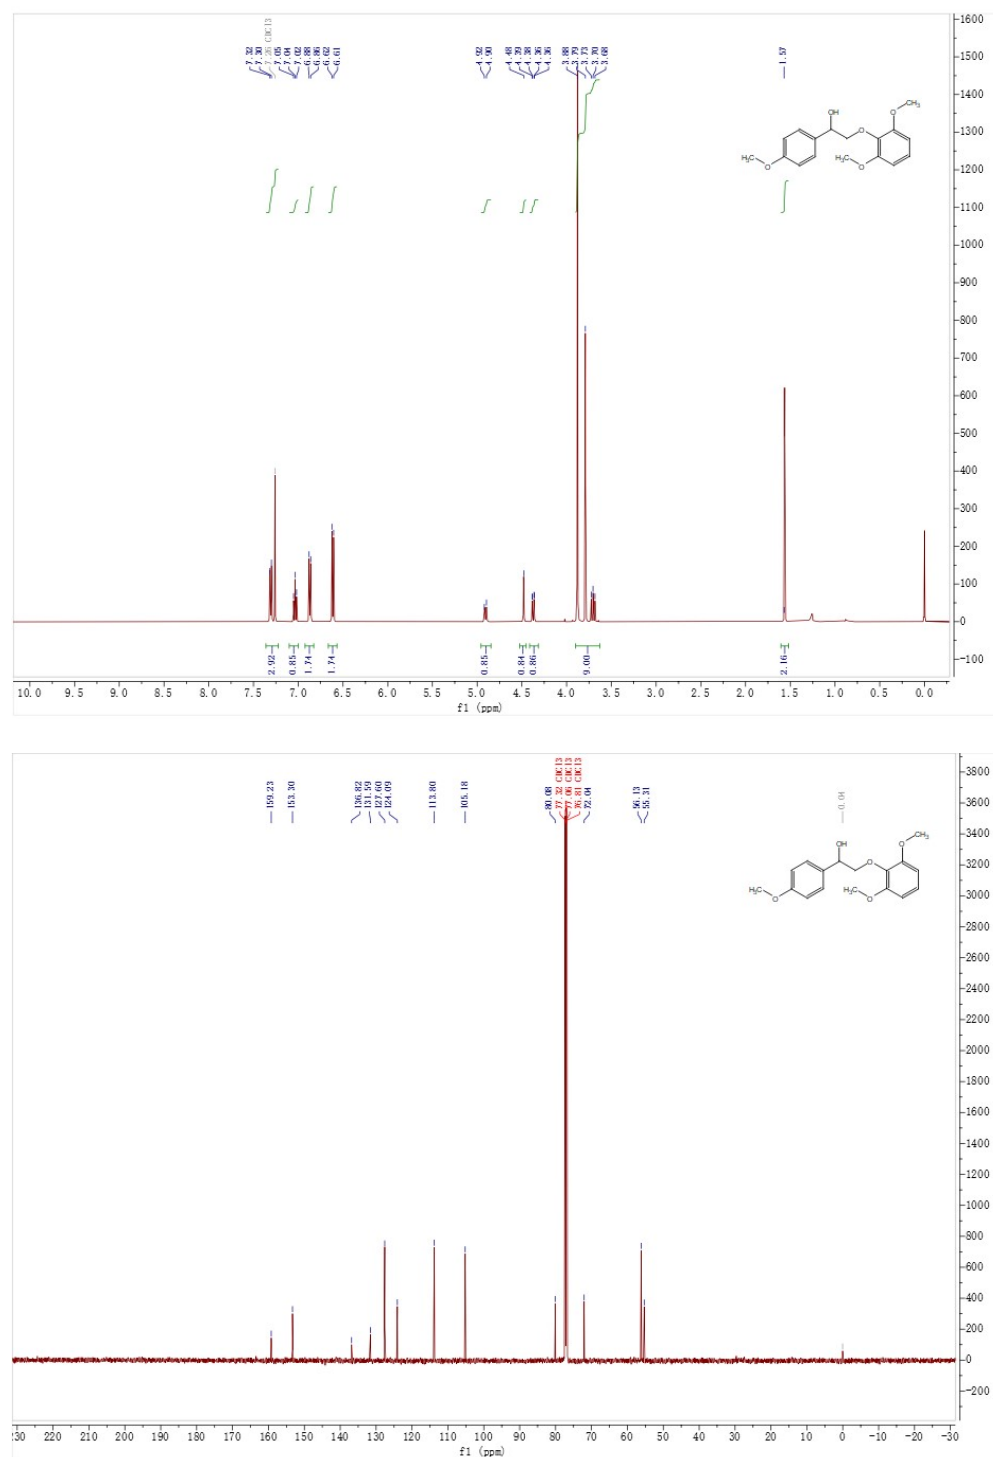

Figure

S20 <sup>1</sup>H (top) and <sup>13</sup>C (bottom) NMR spectra of 2-(2,6-dimethoxyphenoxy)-1-(4-methoxyphenyl) ethan-1-ol.



# SUPPORTING INFORMATION

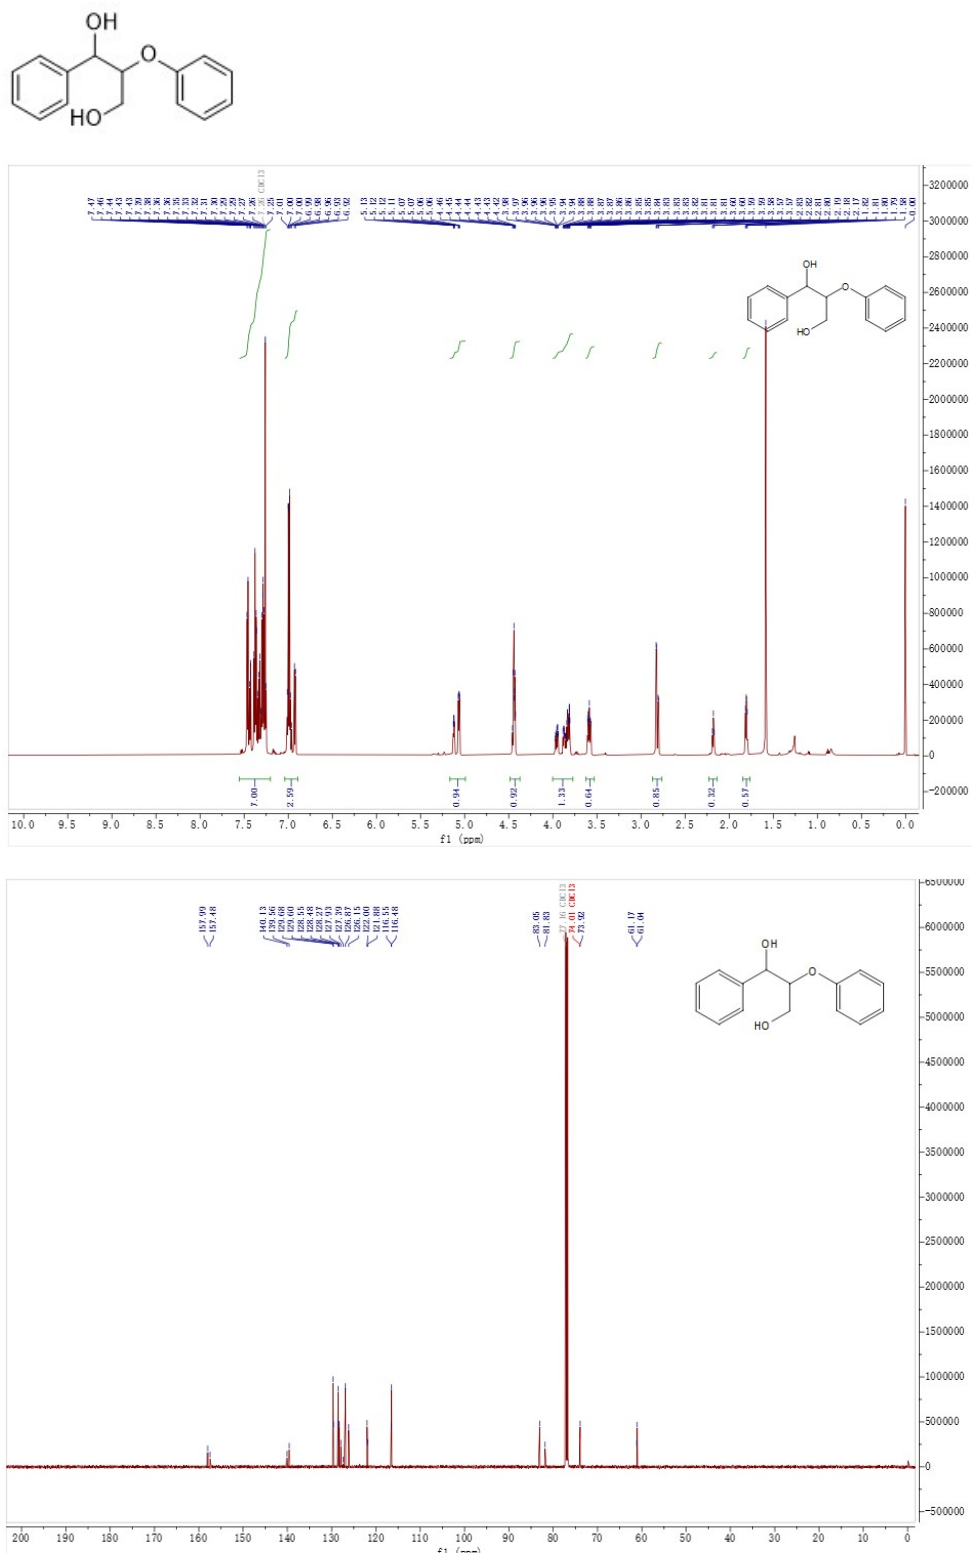

**Figure S21** <sup>1</sup>H (top) and <sup>13</sup>C (bottom) NMR spectra of 2-phenoxy-1-phenylpropane-1,3-diol.

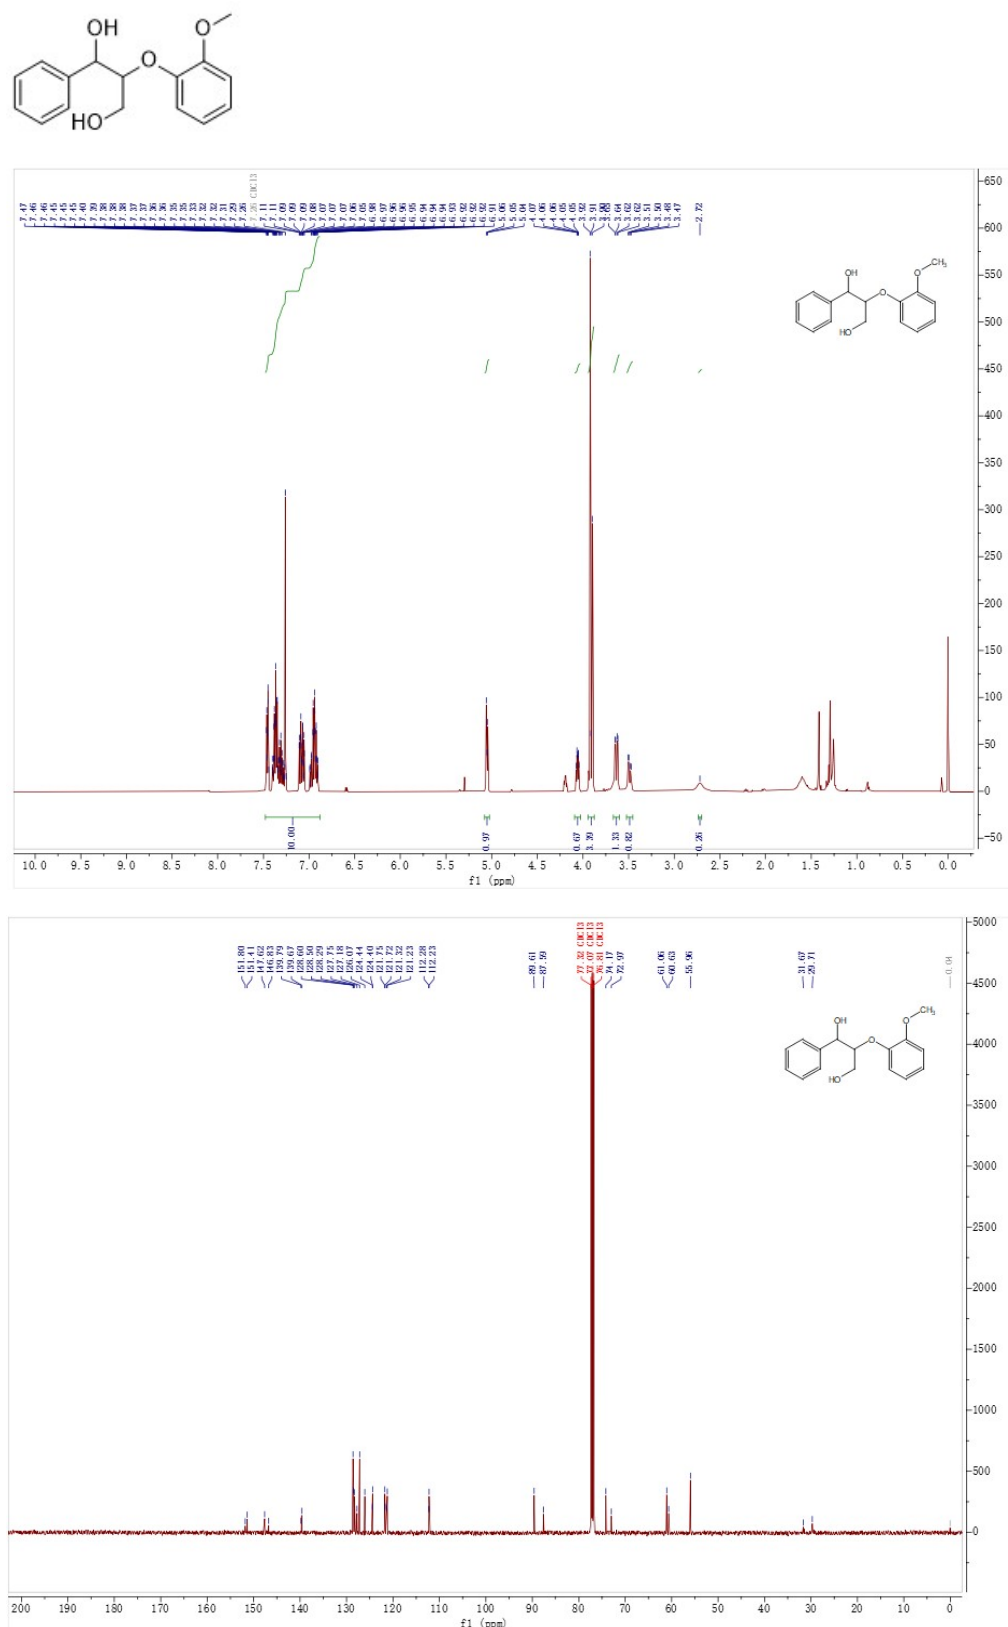

**Figure S22**  $^1\text{H}$  (top) and  $^{13}\text{C}$  (bottom) NMR spectra of 2-(2-methoxyphenoxy)-1-phenylpropane-1,3-diol.

# SUPPORTING INFORMATION

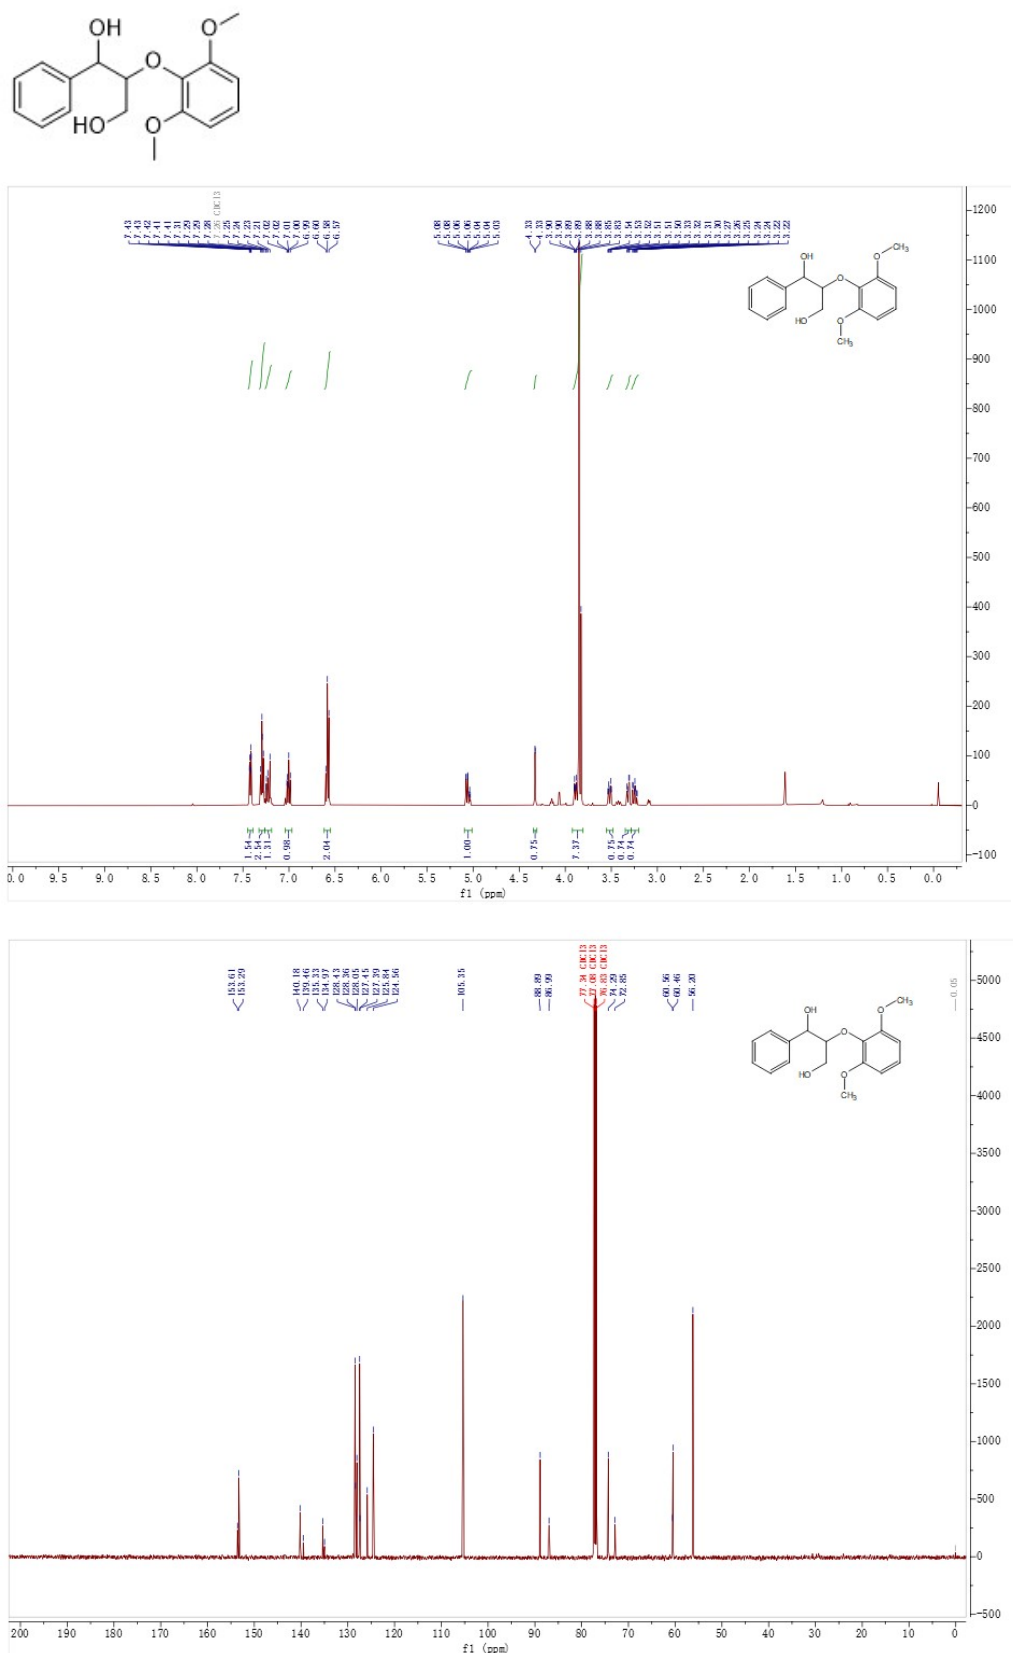

**Figure S23** <sup>1</sup>H (top) and <sup>13</sup>C (bottom) NMR spectra of 2-(2,6-dimethoxyphenoxy)-1-phenylpropane-1,3-diol.

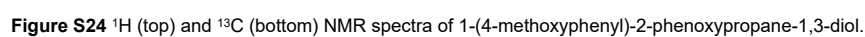

### 7. References

1. S. A. Kim, S. E. Kim, Y. K. Kim and H. Y. Jang, *ACS Omega*, 2020, **5**, 31684-31691.
2. D. Huang, R. Li, P. Xu, T. Li, R. Deng, S. Chen and Q. Zhang, *Chem. Eng. J.*, 2020, **402**, 126237.
